# Supplementary material for: Spatiotemporal Distribution of Sustained Dengue Hotspots Associated with Climate and Urbanisation in Singapore
Source: Research Square preprint supplement (doi:10.21203/rs.3.rs-6004671/v1), 2025-04-07
Supplement: Supplementary file 1 [file 04bd416b4020b92543633fa8.xlsx]

## Sheet: Subzone Codes
Subzone code	Subzone
C03	Alexandra Hill
C04	Alexandra North
C05	Aljunied
C06	Anak Bukit
C09	Anson
C10	Balestier
C102	Institution Hill
C104	Istana Negara
C107	Joo Seng
C114	Kallang Bahru
C115	Kallang Way
C116	Kampong Bugis
C117	Kampong Glam
C118	Kampong Java
C119	Kampong Tiong Bahru
C12	Bayfront Subzone
C120	Kampong Ubi
C122	Katong
C126	Kent Ridge
C129	Kim Keat
C133	Lavender
C134	Leedon Park
C135	Leonie Hill
C137	Little India
C139	Lorong 8 Toa Payoh
C147	Mackenzie
C148	Macpherson
C149	Malcolm
C153	Margaret Drive
C154	Marina Centre
C155	Marina East
C156	Marina East (Mp)
C157	Marina South
C158	Marine Parade
C159	Maritime Square
C160	Marymount
C162	Maxwell
C163	Mei Chin
C165	Monk'S Hill
C166	Moulmein
C167	Mount Emily
C168	Mount Pleasant
C169	Mountbatten
C17	Bencoolen
C170	Nassim
C171	National University Of S'Pore
C174	Newton Circus
C179	One North
C18	Bendemeer
C180	One Tree Hill
C181	Orange Grove
C182	Oxley
C185	Pasir Panjang 1
C186	Pasir Panjang 2
C192	Paterson
C196	Pearl'S Hill
C197	Pei Chun
C20	Bidadari
C200	People'S Park
C201	Phillip
C204	Port
C205	Potong Pasir
C21	Bishan East
C212	Queensway
C213	Raffles Place
C214	Redhill
C216	Ridout
C218	Robertson Quay
C219	Rochor Canal
C22	Boat Quay
C223	Selegie
C23	Boon Keng
C237	Sennett
C241	Sentosa
C25	Boon Teck
C252	Singapore General Hospital
C253	Singapore Polytechnic
C254	Somerset
C255	Southern Group
C257	Straits View
C259	Sungei Road
C26	Boulevard
C261	Swiss Club
C268	Tanglin
C269	Tanglin Halt
C27	Braddell
C271	Tanjong Pagar
C272	Tanjong Rhu
C275	Telok Blangah Drive
C276	Telok Blangah Rise
C277	Telok Blangah Way
C28	Bras Basah
C281	Tiong Bahru
C282	Tiong Bahru Station
C283	Toa Payoh Central
C284	Toa Payoh West
C296	Tyersall
C297	Ulu Pandan
C299	Upper Thomson
C30	Bugis
C300	Victoria
C310	Woodleigh
C35	Bukit Ho Swee
C36	Bukit Merah
C37	Cairnhill
C38	Cecil
C39	Central Subzone
C45	Chatsworth
C48	China Square
C49	Chinatown
C53	City Hall
C54	City Terminals
C55	Clarke Quay
C60	Clifford Pier
C61	Commonwealth
C64	Coronation Road
C65	Crawford
C68	Depot Road
C69	Dhoby Ghaut
C70	Dover
C71	Dunearn
C72	East Coast
C73	Everton Park
C76	Farrer Court
C77	Farrer Park
C80	Fort Canning
C83	Geylang Bahru
C84	Geylang East
C85	Ghim Moh
C87	Goodwood Park
C92	Henderson Hill
C93	Hillcrest
C95	Holland Drive
C96	Holland Road
E02	Airport Road
E113	Kaki Bukit
E125	Kembangan
E13	Bayshore
E14	Bedok North
E145	Loyang East
E146	Loyang West
E15	Bedok Reservoir
E16	Bedok South
E187	Pasir Ris Central
E188	Pasir Ris Drive
E189	Pasir Ris Park
E190	Pasir Ris Wafer Fab Park
E191	Pasir Ris West
E193	Paya Lebar East
E194	Paya Lebar North
E195	Paya Lebar West
E203	Plab
E248	Siglap
E249	Simei
E265	Tampines East
E266	Tampines North
E267	Tampines West
E311	Xilin
E41	Changi Airport
E42	Changi Bay
E43	Changi Point
E44	Changi West
E79	Flora Drive
E81	Frankel
N01	Admiralty
N127	Khatib
N131	Kranji
N136	Lim Chu Kang
N144	Lower Seletar
N150	Mandai East
N151	Mandai Estate
N152	Mandai West
N164	Midview
N173	Nee Soon
N175	North Coast
N177	Northland
N184	Pang Sua
N208	Pulau Seletar
N215	Reservoir View
N228	Sembawang Central
N229	Sembawang East
N231	Sembawang North
N232	Sembawang Springs
N233	Sembawang Straits
N238	Senoko North
N239	Senoko South
N240	Senoko West
N250	Simpang North
N251	Simpang South
N256	Springleaf
N270	Tanjong Irau
N280	The Wharves
N295	Turf Club
N305	Woodgrove
N306	Woodlands East
N307	Woodlands Regional Centre
N308	Woodlands South
N309	Woodlands West
N317	Yishun Central
N318	Yishun East
N319	Yishun South
N320	Yishun West
N40	Central Water Catchment
N82	Gali Batu
N88	Greenwood Park
NE07	Anchorvale
NE08	Ang Mo Kio Town Centre
NE100	Hougang East
NE101	Hougang West
NE121	Kangkar
NE124	Kebun Bahru
NE130	Kovan
NE140	Lorong Ah Soo
NE141	Lorong Chuan
NE142	Lorong Halus
NE143	Lorong Halus North
NE161	Matilda
NE176	North-Eastern Islands
NE178	Northshore
NE206	Pulau Punggol Barat
NE207	Pulau Punggol Timor
NE209	Punggol Canal
NE210	Punggol Field
NE211	Punggol Town Centre
NE217	Rivervale
NE224	Seletar
NE225	Seletar Aerospace Park
NE226	Seletar Hills
NE230	Sembawang Hills
NE234	Sengkang Town Centre
NE235	Sengkang West
NE242	Serangoon Central
NE243	Serangoon Garden
NE244	Serangoon North
NE245	Serangoon North Ind Estate
NE246	Shangri-La
NE262	Tagore
NE263	Tai Seng
NE287	Townsville
NE288	Trafalgar
NE298	Upper Paya Lebar
NE301	Waterway East
NE313	Yio Chu Kang
NE314	Yio Chu Kang East
NE315	Yio Chu Kang North
NE316	Yio Chu Kang West
NE46	Cheng San
NE52	Chong Boon
NE62	Compassvale
NE63	Coney Island
NE67	Defu Industrial Park
NE78	Fernvale
NE99	Hougang Central
W103	International Business Park
W105	Jelebu
W106	Joo Koon
W108	Jurong Gateway
W109	Jurong Island And Bukom
W11	Bangkit
W110	Jurong Port
W111	Jurong River
W112	Jurong West Central
W123	Keat Hong
W128	Kian Teck
W132	Lakeside
W138	Liu Fang
W172	Nature Reserve
W183	Pandan
W19	Benoi Sector
W198	Peng Siang
W199	Penjuru Crescent
W202	Pioneer Sector
W220	Safti
W221	Samulun
W222	Saujana
W227	Semakau
W236	Senja
W24	Boon Lay Place
W247	Shipyard
W258	Sudong
W260	Sunset Way
W264	Taman Jurong
W273	Teban Gardens
W274	Teck Whye
W278	Tengah
W279	Tengeh
W285	Toh Guan
W286	Toh Tuck
W289	Tuas Bay
W29	Brickworks
W290	Tuas North
W291	Tuas Promenade
W292	Tuas View
W293	Tuas View Extension
W294	Tukang
W302	Wenya
W303	West Coast
W304	Western Water Catchment
W31	Bukit Batok Central
W312	Yew Tee
W32	Bukit Batok East
W321	Yuhua East
W322	Yuhua West
W323	Yunnan
W33	Bukit Batok South
W34	Bukit Batok West
W47	Chin Bee
W50	Choa Chu Kang Central
W51	Choa Chu Kang North
W56	Clementi Central
W57	Clementi North
W58	Clementi West
W59	Clementi Woods
W66	Dairy Farm
W74	Faber
W75	Fajar
W86	Gombak
W89	Guilin
W90	Gul Basin
W91	Gul Circle
W94	Hillview
W97	Hong Kah
W98	Hong Kah North

## Sheet: 2013
S.No	SUBZONE_Name	May	June	July	Aug	Sep	Oct	Nov	Dec
1	Admiralty	0	0	0	0	0	0	0	1
2	Airport Road	0	0	0	0	0	0	0	0
3	Alexandra Hill	0	2	2	0	0	1	1	0
4	Alexandra North	0	2	3	0	0	0	0	0
5	Aljunied	12	12	78	0	0	11	41	97
6	Anak Bukit	0	0	0	0	0	0	6	6
7	Anchorvale	0	0	0	0	0	0	1	0
8	Ang Mo Kio Town Centre	0	0	0	0	0	0	0	0
9	Anson	0	0	0	0	0	0	0	0
10	Balestier	10	0	24	0	0	1	20	73
11	Bangkit	0	5	36	0	0	0	2	0
12	Bayfront Subzone	0	0	0	0	0	0	0	0
13	Bayshore	0	0	1	0	0	0	0	0
14	Bedok North	0	0	6	0	0	0	3	6
15	Bedok Reservoir	0	12	4	5	0	28	100	0
16	Bedok South	0	0	3	0	0	2	3	1
17	Bencoolen	0	0	0	0	0	0	0	0
18	Bendemeer	8	18	23	0	0	0	8	1
19	Benoi Sector	0	0	0	0	2	0	0	0
20	Bidadari	0	0	0	0	0	0	0	0
21	Bishan East	0	1	4	0	0	0	0	0
22	Boat Quay	0	0	0	0	4	0	0	0
23	Boon Keng	0	2	2	0	0	0	4	6
24	Boon Lay Place	0	5	8	0	0	0	0	0
25	Boon Teck	0	0	2	0	0	14	1	0
26	Boulevard	0	0	0	0	0	0	0	0
27	Braddell	0	0	0	0	0	1	4	2
28	Bras Basah	0	0	0	0	0	0	0	0
29	Brickworks	0	0	0	0	0	0	0	0
30	Bugis	0	0	0	0	0	0	0	0
31	Bukit Batok Central	0	0	0	0	0	1	1	0
32	Bukit Batok East	0	1	0	0	0	2	2	2
33	Bukit Batok South	0	0	0	0	0	1	0	0
34	Bukit Batok West	0	0	0	0	0	0	0	8
35	Bukit Ho Swee	2	5	0	0	0	2	2	0
36	Bukit Merah	0	0	0	0	0	0	0	0
37	Cairnhill	0	0	0	0	0	0	7	0
38	Cecil	0	0	0	0	0	0	1	0
39	Central Subzone	0	0	0	0	0	0	0	0
40	Central Water Catchment	0	0	0	0	0	0	0	0
41	Changi Airport	0	0	0	0	0	0	0	0
42	Changi Bay	0	0	0	0	0	0	0	0
43	Changi Point	0	0	0	0	0	0	0	0
44	Changi West	0	0	0	0	0	0	1	0
45	Chatsworth	0	0	0	0	0	0	0	0
46	Cheng San	0	13	0	0	0	0	4	4
47	Chin Bee	2	6	5	0	0	0	0	3
48	China Square	0	0	0	0	0	0	0	0
49	Chinatown	0	0	0	0	0	0	6	5
50	Choa Chu Kang Central	0	4	0	0	0	0	4	8
51	Choa Chu Kang North	49	138	166	0	0	0	0	6
52	Chong Boon	0	0	0	0	0	0	0	0
53	City Hall	0	1	0	0	0	0	0	0
54	City Terminals	0	0	0	0	0	0	0	0
55	Clarke Quay	0	0	0	0	0	0	0	0
56	Clementi Central	0	0	0	0	1	0	0	0
57	Clementi North	0	0	8	0	0	2	6	0
58	Clementi West	0	0	0	0	0	0	0	0
59	Clementi Woods	0	0	0	0	0	0	0	0
60	Clifford Pier	0	0	0	0	1	0	0	0
61	Commonwealth	0	0	0	0	0	0	0	3
62	Compassvale	4	0	0	0	0	0	2	0
63	Coney Island	0	0	0	0	0	0	0	0
64	Coronation Road	0	0	1	0	0	0	1	0
65	Crawford	0	7	6	0	0	0	0	0
66	Dairy Farm	0	1	0	0	0	0	0	0
67	Defu Industrial Park	0	0	0	0	0	0	0	0
68	Depot Road	0	0	0	0	0	0	0	0
69	Dhoby Ghaut	0	0	0	0	0	1	3	0
70	Dover	0	0	0	0	0	0	0	0
71	Dunearn	0	0	0	0	0	0	0	0
72	East Coast	0	0	0	0	0	0	0	0
73	Everton Park	0	0	2	6	1	0	2	0
74	Faber	0	0	0	0	0	0	0	0
75	Fajar	0	4	20	0	0	2	2	1
76	Farrer Court	6	5	2	0	0	0	2	1
77	Farrer Park	0	0	1	0	0	3	3	7
78	Fernvale	0	0	0	1	1	2	2	3
79	Flora Drive	0	0	0	1	1	0	0	0
80	Fort Canning	0	0	0	0	0	0	0	0
81	Frankel	6	12	49	0	0	1	1	2
82	Gali Batu	0	0	0	0	0	0	0	0
83	Geylang Bahru	0	0	5	0	0	0	3	7
84	Geylang East	8	1	21	0	0	0	5	4
85	Ghim Moh	0	0	0	0	0	0	0	0
86	Gombak	0	0	0	0	0	0	0	0
87	Goodwood Park	0	0	0	0	0	2	8	1
88	Greenwood Park	0	0	0	1	0	0	0	0
89	Guilin	4	1	0	0	0	0	0	1
90	Gul Basin	0	0	0	0	0	0	0	0
91	Gul Circle	0	0	0	0	0	0	0	0
92	Henderson Hill	0	0	5	3	6	0	2	0
93	Hillcrest	0	0	0	0	0	0	4	5
94	Hillview	0	1	2	0	0	0	3	0
95	Holland Drive	0	0	0	0	0	0	0	0
96	Holland Road	0	0	0	17	20	0	0	1
97	Hong Kah	10	25	38	0	0	3	8	2
98	Hong Kah North	2	6	0	0	0	0	6	0
99	Hougang Central	0	0	0	6	7	0	0	0
100	Hougang East	0	28	44	0	0	3	9	1
101	Hougang West	21	34	7	0	0	0	4	2
102	Institution Hill	0	0	0	0	0	0	5	2
103	International Business Park	0	0	0	15	1	0	0	0
104	Istana Negara	0	0	0	0	0	0	0	0
105	Jelebu	0	18	29	4	0	2	2	0
106	Joo Koon	0	0	0	38	15	0	0	0
107	Joo Seng	0	3	2	0	0	5	27	31
108	Jurong Gateway	0	0	0	0	0	0	0	0
109	Jurong Island And Bukom	0	0	0	0	0	0	0	0
110	Jurong Port	0	0	0	0	0	0	0	0
111	Jurong River	0	0	0	1	0	0	0	0
112	Jurong West Central	0	0	6	0	0	0	0	0
113	Kaki Bukit	15	9	12	0	0	4	6	8
114	Kallang Bahru	0	2	1	2	0	0	1	0
115	Kallang Way	0	0	3	3	0	0	0	1
116	Kampong Bugis	0	0	0	0	0	0	0	0
117	Kampong Glam	0	0	0	1	0	0	0	0
118	Kampong Java	0	21	18	0	0	2	5	2
119	Kampong Tiong Bahru	0	4	14	0	0	0	0	0
120	Kampong Ubi	0	1	21	0	0	3	4	6
121	Kangkar	0	2	11	0	0	2	8	4
122	Katong	0	3	9	0	0	0	0	2
123	Keat Hong	0	0	0	20	23	0	2	0
124	Kebun Bahru	0	3	0	0	0	4	1	18
125	Kembangan	25	11	57	0	0	4	22	12
126	Kent Ridge	0	0	0	0	0	0	0	0
127	Khatib	0	0	2	0	0	0	2	5
128	Kian Teck	0	0	0	6	1	0	0	0
129	Kim Keat	0	0	0	0	0	0	3	0
130	Kovan	4	0	4	2	2	14	52	28
131	Kranji	0	0	0	0	0	0	0	1
132	Lakeside	2	3	0	0	0	0	0	1
133	Lavender	0	17	20	0	0	0	3	6
134	Leedon Park	0	1	0	0	1	0	0	1
135	Leonie Hill	0	0	0	0	0	0	5	2
136	Lim Chu Kang	0	0	0	0	0	0	0	0
137	Little India	0	0	4	0	0	0	3	0
138	Liu Fang	0	0	0	2	4	0	0	0
139	Lorong 8 Toa Payoh	0	0	0	0	0	2	9	1
140	Lorong Ah Soo	2	31	13	2	3	1	6	11
141	Lorong Chuan	10	10	20	0	1	1	1	7
142	Lorong Halus	0	0	0	0	1	0	0	0
143	Lorong Halus North	0	0	0	0	0	0	0	0
144	Lower Seletar	0	0	0	24	11	0	0	0
145	Loyang East	0	0	0	2	0	0	0	0
146	Loyang West	0	0	0	0	0	0	0	0
147	Mackenzie	0	0	0	3	0	0	0	0
148	Macpherson	0	9	33	0	0	0	0	5
149	Malcolm	0	0	2	0	0	0	0	0
150	Mandai East	0	0	0	0	0	0	0	0
151	Mandai Estate	0	0	1	0	0	2	2	0
152	Mandai West	0	0	0	4	0	0	0	0
153	Margaret Drive	0	12	13	0	0	0	0	5
154	Marina Centre	0	0	0	0	0	0	0	0
155	Marina East	0	0	0	0	0	0	0	0
156	Marina East (Mp)	0	0	0	0	0	0	0	0
157	Marina South	0	0	0	0	2	0	0	0
158	Marine Parade	0	4	6	0	0	0	1	2
159	Maritime Square	0	0	0	5	8	0	0	0
160	Marymount	2	1	1	0	0	1	10	13
161	Matilda	0	0	0	0	0	0	5	0
162	Maxwell	0	0	0	0	0	0	0	0
163	Mei Chin	0	0	0	3	16	0	1	0
164	Midview	0	10	0	0	0	0	3	0
165	Monk'S Hill	0	0	0	0	0	0	1	0
166	Moulmein	0	0	0	2	0	1	6	3
167	Mount Emily	0	0	0	0	0	0	0	0
168	Mount Pleasant	0	0	0	1	0	0	0	0
169	Mountbatten	0	0	1	7	3	0	1	0
170	Nassim	0	0	0	8	11	2	4	0
171	National University Of S'Pore	0	0	0	0	0	0	0	0
172	Nature Reserve	0	0	0	0	0	0	0	1
173	Nee Soon	0	0	0	0	0	0	0	0
174	Newton Circus	0	0	0	0	2	0	2	0
175	North Coast	0	0	0	16	17	2	0	0
176	North-Eastern Islands	0	0	0	1	0	0	0	0
177	Northland	70	133	164	0	0	2	4	2
178	Northshore	0	0	0	0	1	0	0	0
179	One North	0	1	2	11	16	0	0	0
180	One Tree Hill	0	0	0	2	15	0	0	0
181	Orange Grove	0	0	0	7	10	0	4	0
182	Oxley	0	0	0	0	0	3	12	0
183	Pandan	0	0	0	0	0	0	0	0
184	Pang Sua	0	0	0	4	2	0	0	0
185	Pasir Panjang 1	0	0	0	0	3	0	0	0
186	Pasir Panjang 2	0	0	0	0	0	0	0	0
187	Pasir Ris Central	6	72	5	0	0	4	13	11
188	Pasir Ris Drive	0	25	130	0	0	7	32	10
189	Pasir Ris Park	0	2	9	0	0	0	0	0
190	Pasir Ris Wafer Fab Park	0	0	0	4	3	0	0	0
191	Pasir Ris West	0	0	8	12	0	0	0	0
192	Paterson	0	0	0	0	0	0	0	0
193	Paya Lebar East	0	0	0	4	7	0	0	0
194	Paya Lebar North	2	0	0	0	0	0	0	0
195	Paya Lebar West	0	0	0	0	0	0	0	0
196	Pearl'S Hill	0	0	0	0	0	0	2	2
197	Pei Chun	0	0	0	0	0	7	17	0
198	Peng Siang	0	0	5	0	0	2	2	3
199	Penjuru Crescent	0	0	0	25	1	0	0	0
200	People'S Park	0	0	0	2	7	0	0	0
201	Phillip	0	0	0	58	55	0	0	0
202	Pioneer Sector	0	0	0	0	0	0	0	0
203	Plab	0	0	0	0	0	0	0	0
204	Port	0	0	0	0	3	0	0	0
205	Potong Pasir	0	0	0	0	0	0	4	0
206	Pulau Punggol Barat	0	0	0	3	5	0	0	0
207	Pulau Punggol Timor	0	0	0	7	0	0	0	0
208	Pulau Seletar	0	0	0	0	0	0	0	0
209	Punggol Canal	0	0	0	0	0	0	0	0
210	Punggol Field	0	2	0	0	4	0	0	0
211	Punggol Town Centre	0	0	0	2	9	0	0	0
212	Queensway	0	0	0	0	0	0	0	0
213	Raffles Place	0	0	0	0	2	0	0	0
214	Redhill	0	7	12	0	0	0	0	0
215	Reservoir View	0	0	0	0	0	0	0	0
216	Ridout	0	2	3	0	0	0	0	0
217	Rivervale	0	3	0	0	8	0	0	2
218	Robertson Quay	0	0	0	0	0	0	1	0
219	Rochor Canal	0	0	0	0	0	0	0	0
220	Safti	0	0	0	0	0	0	0	0
221	Samulun	0	0	0	0	0	0	0	0
222	Saujana	0	3	0	7	5	0	0	0
223	Selegie	0	0	0	7	7	0	0	0
224	Seletar	0	0	0	2	6	0	0	0
225	Seletar Aerospace Park	0	0	0	1	0	0	0	0
226	Seletar Hills	0	0	0	47	0	0	2	5
227	Semakau	0	0	0	0	0	0	0	0
228	Sembawang Central	0	0	0	0	0	1	3	0
229	Sembawang East	0	0	0	2	5	0	0	0
230	Sembawang Hills	0	0	0	0	0	1	2	0
231	Sembawang North	0	0	2	4	0	0	0	6
232	Sembawang Springs	0	0	0	0	2	0	2	5
233	Sembawang Straits	0	0	0	2	0	0	0	0
234	Sengkang Town Centre	6	0	2	0	0	0	2	1
235	Sengkang West	0	0	0	24	18	0	0	0
236	Senja	0	0	0	0	0	0	0	0
237	Sennett	0	0	0	0	0	0	1	4
238	Senoko North	0	0	0	0	0	0	0	0
239	Senoko South	0	0	0	16	8	0	0	0
240	Senoko West	0	0	0	0	0	0	0	1
241	Sentosa	0	0	0	0	7	0	0	0
242	Serangoon Central	8	10	39	0	0	2	2	8
243	Serangoon Garden	24	21	30	0	2	2	6	3
244	Serangoon North	0	0	0	0	0	0	0	0
245	Serangoon North Ind Estate	0	0	0	0	0	0	0	0
246	Shangri-La	0	3	0	2	2	0	1	2
247	Shipyard	0	0	0	0	0	0	0	0
248	Siglap	0	0	2	0	0	0	0	0
249	Simei	0	23	11	0	0	0	0	0
250	Simpang North	0	0	0	0	0	0	0	0
251	Simpang South	0	0	0	3	0	0	0	0
252	Singapore General Hospital	0	0	1	0	0	0	0	0
253	Singapore Polytechnic	0	0	0	2	2	0	0	0
254	Somerset	0	0	0	0	0	2	7	1
255	Southern Group	0	0	0	2	1	0	0	0
256	Springleaf	0	0	0	0	0	0	0	0
257	Straits View	0	0	0	8	0	0	0	0
258	Sudong	0	0	0	0	0	0	0	0
259	Sungei Road	0	0	8	6	1	0	0	1
260	Sunset Way	0	0	0	0	0	2	2	0
261	Swiss Club	0	0	0	0	0	0	0	0
262	Tagore	0	0	0	0	0	0	0	0
263	Tai Seng	0	0	3	0	0	0	5	0
264	Taman Jurong	8	12	3	16	7	3	6	6
265	Tampines East	56	142	240	0	0	5	15	18
266	Tampines North	0	0	0	0	0	0	0	0
267	Tampines West	109	211	345	0	0	28	34	2
268	Tanglin	0	0	0	0	0	0	0	0
269	Tanglin Halt	4	9	14	26	0	0	3	8
270	Tanjong Irau	0	0	0	0	0	0	0	0
271	Tanjong Pagar	0	0	0	0	0	0	0	0
272	Tanjong Rhu	0	0	1	4	6	0	0	0
273	Teban Gardens	0	0	0	0	0	0	0	1
274	Teck Whye	0	0	0	0	0	3	9	2
275	Telok Blangah Drive	0	0	0	0	0	0	1	0
276	Telok Blangah Rise	0	0	2	3	2	0	0	3
277	Telok Blangah Way	0	0	8	4	0	0	0	0
278	Tengah	0	0	0	0	0	0	0	0
279	Tengeh	0	0	0	0	0	0	0	0
280	The Wharves	0	0	0	0	0	0	0	0
281	Tiong Bahru	1	3	0	0	0	0	2	0
282	Tiong Bahru Station	0	0	0	0	0	0	0	0
283	Toa Payoh Central	0	6	2	0	0	13	3	5
284	Toa Payoh West	9	1	4	0	0	0	3	1
285	Toh Guan	0	2	9	9	4	20	3	2
286	Toh Tuck	0	0	0	0	0	0	0	1
287	Townsville	0	4	0	0	0	0	1	2
288	Trafalgar	0	4	0	0	0	0	0	2
289	Tuas Bay	0	0	0	0	2	0	0	0
290	Tuas North	0	0	0	0	3	0	0	0
291	Tuas Promenade	0	0	0	51	6	0	1	0
292	Tuas View	0	0	0	0	0	0	0	0
293	Tuas View Extension	0	0	0	0	0	0	0	0
294	Tukang	0	0	0	0	0	0	0	0
295	Turf Club	0	0	0	0	0	0	0	0
296	Tyersall	0	0	0	0	0	0	4	0
297	Ulu Pandan	0	0	0	0	0	0	0	0
298	Upper Paya Lebar	5	9	12	0	0	0	5	26
299	Upper Thomson	8	4	3	0	0	15	73	22
300	Victoria	0	0	0	2	2	0	0	0
301	Waterway East	0	0	0	0	0	0	0	0
302	Wenya	0	0	0	0	0	0	2	0
303	West Coast	0	0	0	4	4	0	0	0
304	Western Water Catchment	0	0	0	0	0	0	1	0
305	Woodgrove	0	5	0	0	0	2	15	4
306	Woodlands East	0	0	5	0	0	6	7	15
307	Woodlands Regional Centre	0	0	1	0	0	0	0	0
308	Woodlands South	5	0	3	3	0	0	0	0
309	Woodlands West	0	0	5	26	0	0	0	5
310	Woodleigh	0	0	0	7	22	0	0	0
311	Xilin	0	0	0	0	0	0	0	0
312	Yew Tee	0	10	33	0	0	0	5	2
313	Yio Chu Kang	0	0	0	0	0	0	0	0
314	Yio Chu Kang East	0	0	0	0	0	0	0	0
315	Yio Chu Kang North	0	0	0	0	0	0	0	0
316	Yio Chu Kang West	0	0	0	0	0	0	0	2
317	Yishun Central	0	0	0	0	0	0	0	0
318	Yishun East	0	41	125	0	0	13	2	3
319	Yishun South	0	0	12	0	0	0	2	0
320	Yishun West	2	24	46	0	0	6	46	80
321	Yuhua East	0	0	0	0	0	4	4	4
322	Yuhua West	0	3	0	0	0	2	0	0
323	Yunnan	0	24	46	0	0	2	2	6
		527	1348	2236	643	441	292	876	737
	Total cases	7100
	Monthly Average	887.5

## Sheet: 2014
S.No	SUBZONE_Name	Jan	Feb	March	April	May	June	July	Aug	Sep	Oct	Nov	Dec
1	Admiralty	0	0	0	0	0	0	0	0	0	0	0	0
2	Airport Road	0	0	0	0	0	0	0	0	0	0	0	0
3	Alexandra Hill	2	0	0	0	0	0	3	0	1	0	0	2
4	Alexandra North	0	0	0	0	0	0	0	0	0	0	0	0
5	Aljunied	54	12	2	5	4	0	31	63	52	67	20	94
6	Anak Bukit	9	9	12	0	0	0	2	6	2	5	0	0
7	Anchorvale	2	0	0	0	0	0	3	0	4	0	0	0
8	Ang Mo Kio Town Centre	0	0	0	0	0	1	0	0	0	0	0	0
9	Anson	0	0	0	0	0	0	0	0	0	0	0	0
10	Balestier	43	7	0	0	0	2	7	6	2	4	0	0
11	Bangkit	3	2	0	0	0	0	4	5	41	36	0	4
12	Bayfront Subzone	0	0	0	0	0	0	0	0	0	0	0	0
13	Bayshore	1	0	0	0	0	0	4	0	2	2	0	0
14	Bedok North	6	8	4	2	2	0	14	16	38	60	2	29
15	Bedok Reservoir	6	0	0	0	0	0	4	5	0	2	0	0
16	Bedok South	0	2	2	3	0	2	3	5	6	9	2	6
17	Bencoolen	0	0	0	0	0	0	0	0	1	0	0	0
18	Bendemeer	4	2	0	0	4	4	11	17	0	2	0	5
19	Benoi Sector	0	0	0	0	0	0	0	0	0	0	0	0
20	Bidadari	0	0	0	0	0	0	0	0	0	0	0	0
21	Bishan East	1	0	0	0	0	2	5	4	0	0	1	36
22	Boat Quay	0	0	0	0	0	0	0	0	0	0	0	0
23	Boon Keng	4	0	0	0	0	2	8	4	0	6	0	4
24	Boon Lay Place	4	0	3	0	0	1	3	11	9	7	2	3
25	Boon Teck	0	0	0	0	0	7	4	0	0	0	0	0
26	Boulevard	0	0	0	0	0	0	0	0	0	0	0	0
27	Braddell	0	0	0	0	0	0	0	0	0	0	0	0
28	Bras Basah	0	0	0	0	0	0	0	0	0	0	0	0
29	Brickworks	0	0	0	0	0	0	0	0	0	0	0	0
30	Bugis	0	0	0	0	0	0	0	1	0	0	0	0
31	Bukit Batok Central	0	0	0	0	0	0	0	0	0	0	0	2
32	Bukit Batok East	0	0	1	0	0	0	8	16	0	0	0	0
33	Bukit Batok South	0	0	0	0	0	0	0	0	0	0	0	0
34	Bukit Batok West	0	2	0	0	0	0	0	0	0	0	0	0
35	Bukit Ho Swee	0	9	0	0	0	0	0	0	0	0	0	0
36	Bukit Merah	0	0	0	0	0	0	0	0	0	0	0	0
37	Cairnhill	0	0	0	0	0	0	1	2	0	0	0	0
38	Cecil	0	0	0	0	0	0	0	0	0	0	0	0
39	Central Subzone	0	0	0	0	0	0	0	0	0	0	0	0
40	Central Water Catchment	0	0	0	0	0	0	0	0	0	0	0	0
41	Changi Airport	0	0	0	0	0	0	0	0	0	0	0	0
42	Changi Bay	0	0	0	0	0	0	0	0	0	0	0	0
43	Changi Point	0	0	0	0	0	0	0	0	0	0	0	0
44	Changi West	0	0	0	0	0	0	2	1	0	0	0	0
45	Chatsworth	0	0	0	0	0	0	0	0	0	0	0	0
46	Cheng San	0	0	0	0	0	2	8	8	0	0	0	0
47	Chin Bee	4	0	1	0	0	0	0	1	0	5	0	0
48	China Square	0	0	0	0	0	0	0	0	0	0	0	0
49	Chinatown	0	2	0	0	0	0	0	0	1	0	0	0
50	Choa Chu Kang Central	0	2	0	0	3	0	11	4	4	0	0	0
51	Choa Chu Kang North	0	0	0	0	0	0	11	12	14	29	7	6
52	Chong Boon	0	0	5	0	0	0	8	9	0	2	0	12
53	City Hall	0	0	0	0	0	0	0	0	0	0	0	6
54	City Terminals	0	0	0	0	0	0	0	0	0	0	0	0
55	Clarke Quay	0	0	0	0	0	0	0	0	0	0	0	0
56	Clementi Central	0	0	0	0	0	0	0	2	0	0	0	0
57	Clementi North	0	4	0	0	0	0	0	7	1	2	0	0
58	Clementi West	0	0	0	0	0	0	5	3	3	7	4	9
59	Clementi Woods	0	2	0	0	0	0	2	0	0	4	0	0
60	Clifford Pier	0	0	0	0	0	0	0	0	0	0	0	0
61	Commonwealth	0	0	0	0	0	0	0	0	0	0	0	0
62	Compassvale	0	0	3	0	0	0	3	4	0	2	0	0
63	Coney Island	0	0	0	0	0	0	0	0	0	0	0	0
64	Coronation Road	0	0	0	0	0	3	0	0	0	0	0	0
65	Crawford	0	0	0	0	0	0	10	2	6	0	0	0
66	Dairy Farm	0	0	0	0	0	0	0	1	9	3	0	0
67	Defu Industrial Park	0	0	0	0	0	0	5	2	0	0	0	0
68	Depot Road	0	0	0	0	0	0	0	0	0	0	0	0
69	Dhoby Ghaut	0	0	0	0	0	0	0	0	0	0	0	0
70	Dover	0	0	0	0	0	1	0	6	0	0	0	0
71	Dunearn	0	0	0	0	0	0	0	0	0	0	0	0
72	East Coast	0	0	0	0	0	0	0	0	0	0	0	0
73	Everton Park	0	0	0	0	0	0	0	0	0	0	0	0
74	Faber	0	0	0	0	0	0	2	0	0	0	0	0
75	Fajar	0	0	0	0	0	2	6	2	3	8	0	2
76	Farrer Court	5	4	0	1	6	10	1	0	0	0	0	0
77	Farrer Park	1	2	0	0	1	0	5	0	4	8	0	0
78	Fernvale	0	0	0	0	0	0	7	0	2	0	0	4
79	Flora Drive	0	0	0	0	0	7	19	27	2	7	0	0
80	Fort Canning	0	0	0	0	0	0	0	0	0	0	0	0
81	Frankel	6	17	7	2	1	0	4	28	5	6	5	9
82	Gali Batu	0	0	0	0	0	0	0	0	0	0	0	2
83	Geylang Bahru	20	0	0	0	0	0	2	6	5	0	0	0
84	Geylang East	5	2	5	17	5	25	29	17	9	16	0	0
85	Ghim Moh	2	0	0	0	0	0	0	0	0	0	0	0
86	Gombak	0	0	0	0	0	0	2	0	6	10	0	0
87	Goodwood Park	0	0	0	0	0	0	0	0	0	1	0	0
88	Greenwood Park	0	0	0	0	0	0	0	0	0	0	0	0
89	Guilin	0	0	2	2	0	0	8	10	0	0	0	0
90	Gul Basin	0	0	0	0	0	0	0	0	0	0	0	0
91	Gul Circle	0	0	0	0	0	0	0	0	0	0	0	0
92	Henderson Hill	0	0	0	0	0	0	0	0	0	0	0	0
93	Hillcrest	0	0	0	0	0	0	0	0	0	0	0	0
94	Hillview	2	0	0	0	0	0	6	6	2	4	4	4
95	Holland Drive	0	0	2	0	0	0	0	0	0	0	0	0
96	Holland Road	0	0	0	0	0	0	0	0	0	0	0	0
97	Hong Kah	8	13	3	0	0	0	12	13	12	39	0	0
98	Hong Kah North	4	0	0	0	0	0	2	4	0	0	0	0
99	Hougang Central	3	4	2	4	11	0	0	0	0	0	0	0
100	Hougang East	0	0	0	0	0	0	7	0	0	6	0	2
101	Hougang West	6	0	0	2	2	10	28	0	6	2	0	1
102	Institution Hill	0	0	0	0	0	0	0	0	0	0	0	0
103	International Business Park	0	0	0	0	0	0	0	0	0	0	0	0
104	Istana Negara	0	0	0	0	0	0	0	0	0	0	0	0
105	Jelebu	0	0	0	0	0	3	0	6	4	2	0	2
106	Joo Koon	0	0	0	0	0	0	0	0	0	0	0	0
107	Joo Seng	4	0	0	0	1	8	126	18	0	2	0	1
108	Jurong Gateway	0	0	0	0	0	0	0	0	0	0	0	0
109	Jurong Island And Bukom	0	0	0	0	0	0	0	0	0	0	0	0
110	Jurong Port	0	0	0	0	0	0	0	0	0	0	0	0
111	Jurong River	0	0	0	0	0	0	0	0	0	0	0	0
112	Jurong West Central	6	0	0	0	0	0	9	6	0	6	0	0
113	Kaki Bukit	6	0	0	0	0	0	27	15	4	2	0	0
114	Kallang Bahru	0	0	0	0	0	0	0	0	0	0	0	4
115	Kallang Way	2	1	0	1	0	3	10	8	0	0	0	0
116	Kampong Bugis	0	0	0	0	0	0	0	0	0	2	0	5
117	Kampong Glam	0	0	0	0	0	0	0	0	2	0	0	0
118	Kampong Java	7	2	0	0	0	6	0	8	2	8	2	7
119	Kampong Tiong Bahru	0	0	0	0	2	0	0	0	0	0	0	0
120	Kampong Ubi	0	0	0	0	0	1	11	40	0	0	0	0
121	Kangkar	0	0	0	0	4	0	20	10	6	6	0	0
122	Katong	1	1	0	2	0	7	14	20	21	28	0	4
123	Keat Hong	4	2	0	0	0	0	153	191	0	6	0	0
124	Kebun Bahru	2	3	0	0	0	0	5	11	9	12	0	0
125	Kembangan	12	0	3	4	4	23	54	26	0	0	3	6
126	Kent Ridge	0	0	0	0	0	0	0	0	0	0	0	0
127	Khatib	0	0	0	0	0	0	0	0	0	2	0	0
128	Kian Teck	0	0	0	0	0	0	0	0	0	0	0	0
129	Kim Keat	0	0	0	0	0	0	0	0	0	0	0	0
130	Kovan	13	24	13	5	1	57	132	69	37	56	0	27
131	Kranji	0	0	0	1	0	0	0	0	0	0	0	0
132	Lakeside	0	0	0	0	0	0	0	0	0	0	0	0
133	Lavender	1	2	0	2	1	0	0	3	12	6	2	0
134	Leedon Park	0	3	0	1	9	12	1	0	0	0	0	0
135	Leonie Hill	0	0	0	0	0	0	0	0	0	0	0	0
136	Lim Chu Kang	0	0	0	0	0	0	0	0	0	0	0	0
137	Little India	2	1	0	0	0	0	2	8	0	1	0	0
138	Liu Fang	0	0	0	0	0	0	0	0	0	0	0	0
139	Lorong 8 Toa Payoh	0	6	2	0	0	0	0	0	0	0	0	0
140	Lorong Ah Soo	9	7	7	59	33	119	240	51	0	4	0	8
141	Lorong Chuan	3	2	0	0	0	0	16	9	0	0	0	0
142	Lorong Halus	0	0	0	0	0	0	0	0	0	0	0	0
143	Lorong Halus North	0	0	0	0	0	0	0	0	0	0	0	0
144	Lower Seletar	0	0	0	0	0	0	0	0	0	0	0	0
145	Loyang East	0	0	0	0	0	0	0	3	0	0	0	0
146	Loyang West	0	0	0	0	0	0	0	0	0	0	0	0
147	Mackenzie	0	0	0	0	0	0	0	0	0	0	0	0
148	Macpherson	7	10	0	4	5	11	264	363	30	56	3	2
149	Malcolm	2	0	0	0	0	2	2	0	0	0	0	0
150	Mandai East	0	0	0	0	0	0	0	0	0	0	0	0
151	Mandai Estate	0	0	0	0	0	0	0	0	0	0	0	1
152	Mandai West	0	0	0	0	0	0	0	0	0	0	0	0
153	Margaret Drive	0	0	0	0	0	0	0	0	0	0	0	0
154	Marina Centre	0	0	0	0	0	0	0	0	0	0	0	0
155	Marina East	0	0	0	0	0	0	0	0	0	0	0	0
156	Marina East (Mp)	0	0	0	0	0	0	0	0	0	0	0	0
157	Marina South	0	0	0	0	0	0	0	0	0	0	0	0
158	Marine Parade	1	0	0	2	3	0	7	3	0	0	0	0
159	Maritime Square	0	0	0	0	0	0	0	0	0	0	0	0
160	Marymount	21	4	6	0	2	2	3	0	7	2	0	1
161	Matilda	0	0	0	0	0	3	1	0	0	0	0	0
162	Maxwell	0	0	0	0	0	0	0	0	0	0	0	0
163	Mei Chin	2	0	0	0	0	1	0	0	0	0	0	0
164	Midview	0	0	3	6	0	1	2	0	2	0	0	0
165	Monk'S Hill	0	0	0	0	0	0	0	0	0	0	0	0
166	Moulmein	1	0	2	0	0	0	2	0	2	9	3	39
167	Mount Emily	0	0	0	0	0	0	0	0	0	0	0	0
168	Mount Pleasant	0	0	0	0	0	0	0	0	0	0	0	0
169	Mountbatten	0	0	0	1	0	0	33	40	0	0	0	2
170	Nassim	0	0	0	0	0	0	0	0	0	0	0	0
171	National University Of S'Pore	0	0	0	0	0	0	0	0	0	0	0	0
172	Nature Reserve	0	0	0	0	0	0	2	5	0	0	0	0
173	Nee Soon	0	0	0	0	0	0	0	0	0	0	0	0
174	Newton Circus	0	0	0	0	0	0	0	0	0	0	0	0
175	North Coast	0	0	0	0	0	0	0	0	0	0	0	0
176	North-Eastern Islands	0	0	0	0	0	0	0	0	0	0	0	0
177	Northland	1	0	3	0	0	0	19	0	0	0	0	0
178	Northshore	0	0	0	0	0	0	0	0	0	0	0	0
179	One North	0	0	0	0	0	0	3	0	0	0	0	0
180	One Tree Hill	0	0	0	0	0	0	0	0	0	0	0	0
181	Orange Grove	0	0	0	0	0	0	0	0	0	0	0	0
182	Oxley	0	0	0	0	0	0	0	0	0	0	0	0
183	Pandan	0	0	0	0	0	0	0	0	0	0	0	0
184	Pang Sua	1	0	0	0	0	0	0	2	0	1	0	0
185	Pasir Panjang 1	0	0	0	0	0	0	0	0	0	0	0	0
186	Pasir Panjang 2	0	0	0	0	0	0	0	0	0	0	0	0
187	Pasir Ris Central	0	0	0	0	2	0	4	0	0	2	0	0
188	Pasir Ris Drive	9	0	0	0	0	2	109	44	21	5	1	35
189	Pasir Ris Park	0	0	0	0	0	0	19	2	3	6	0	10
190	Pasir Ris Wafer Fab Park	0	0	0	0	0	0	0	0	0	0	0	0
191	Pasir Ris West	0	2	0	0	0	0	0	2	0	0	0	0
192	Paterson	0	0	0	0	0	0	0	0	0	0	0	0
193	Paya Lebar East	0	0	0	0	0	0	0	0	0	0	0	0
194	Paya Lebar North	0	0	0	0	0	0	0	0	0	0	0	0
195	Paya Lebar West	0	0	0	0	0	3	12	2	0	0	0	0
196	Pearl'S Hill	0	0	0	0	0	0	0	0	1	0	0	0
197	Pei Chun	2	0	3	0	0	0	2	0	0	0	0	0
198	Peng Siang	7	0	0	0	0	0	194	289	4	8	0	0
199	Penjuru Crescent	0	0	0	0	0	0	0	0	0	0	0	0
200	People'S Park	0	0	0	0	0	0	0	0	0	0	0	0
201	Phillip	0	0	0	0	0	0	0	0	0	0	0	0
202	Pioneer Sector	0	0	0	0	0	0	0	0	0	0	0	0
203	Plab	0	0	0	0	0	0	0	0	0	0	0	0
204	Port	0	0	0	0	0	0	0	0	0	0	0	0
205	Potong Pasir	0	0	0	0	2	0	0	10	6	0	0	0
206	Pulau Punggol Barat	0	0	0	0	0	0	0	0	0	0	0	0
207	Pulau Punggol Timor	0	0	0	0	0	0	0	0	0	0	0	0
208	Pulau Seletar	0	0	0	0	0	0	0	0	0	0	0	0
209	Punggol Canal	0	0	0	0	0	0	0	0	0	0	0	0
210	Punggol Field	0	0	0	0	0	0	3	0	0	0	0	0
211	Punggol Town Centre	0	0	0	0	0	0	0	0	0	0	0	0
212	Queensway	0	0	0	0	0	0	0	0	0	0	0	0
213	Raffles Place	0	0	0	0	0	0	0	0	0	0	0	0
214	Redhill	0	0	0	0	0	0	0	0	1	0	0	0
215	Reservoir View	0	0	0	0	0	0	0	0	0	0	0	0
216	Ridout	0	0	0	0	0	0	0	0	0	0	0	0
217	Rivervale	0	0	0	0	0	3	13	4	0	0	0	2
218	Robertson Quay	0	0	0	0	0	0	0	0	0	0	0	0
219	Rochor Canal	0	0	0	0	0	0	0	0	0	0	0	0
220	Safti	0	0	0	0	0	0	0	0	0	0	0	0
221	Samulun	0	0	0	0	0	0	0	0	0	0	0	0
222	Saujana	1	0	0	0	0	0	2	4	20	0	0	0
223	Selegie	0	0	0	0	0	0	0	0	0	0	0	0
224	Seletar	0	0	0	0	0	0	0	0	0	0	0	0
225	Seletar Aerospace Park	0	0	0	0	0	0	0	0	0	0	0	0
226	Seletar Hills	6	0	0	0	0	0	6	1	0	0	0	2
227	Semakau	0	0	0	0	0	0	0	0	0	0	0	0
228	Sembawang Central	4	0	0	0	0	0	5	2	2	0	0	0
229	Sembawang East	0	0	0	0	0	0	0	0	0	0	0	0
230	Sembawang Hills	0	0	0	0	0	2	0	0	0	0	0	0
231	Sembawang North	0	0	0	0	0	0	2	2	1	2	0	0
232	Sembawang Springs	3	1	0	0	0	0	0	2	0	0	0	0
233	Sembawang Straits	0	0	0	0	0	0	0	0	0	0	0	0
234	Sengkang Town Centre	0	9	33	60	45	3	4	14	0	2	0	0
235	Sengkang West	0	0	0	0	0	0	0	2	0	0	1	1
236	Senja	3	0	0	0	0	0	0	2	0	0	0	0
237	Sennett	11	0	0	8	2	0	8	7	0	0	0	0
238	Senoko North	0	0	0	0	0	0	0	0	0	0	0	0
239	Senoko South	0	0	0	0	0	0	0	0	0	0	0	0
240	Senoko West	0	0	0	0	0	0	0	0	0	0	0	0
241	Sentosa	0	0	0	0	0	0	0	0	0	0	0	0
242	Serangoon Central	7	0	2	2	8	11	38	10	9	8	0	0
243	Serangoon Garden	8	5	9	2	1	9	84	120	37	117	16	97
244	Serangoon North	0	0	0	0	0	0	4	0	0	0	0	0
245	Serangoon North Ind Estate	0	0	0	0	0	0	0	0	0	0	0	0
246	Shangri-La	0	4	0	0	0	0	7	14	0	0	0	0
247	Shipyard	0	0	0	0	0	0	0	0	0	0	0	0
248	Siglap	0	0	0	0	0	0	0	0	0	0	0	0
249	Simei	2	0	0	0	0	0	2	2	7	6	0	8
250	Simpang North	0	0	0	0	0	0	0	0	0	0	0	0
251	Simpang South	0	0	0	0	0	0	0	0	0	0	0	0
252	Singapore General Hospital	0	0	0	0	0	0	0	0	0	0	0	0
253	Singapore Polytechnic	0	0	0	0	0	0	0	0	0	0	0	0
254	Somerset	0	0	0	0	0	0	0	0	0	0	0	0
255	Southern Group	0	0	0	0	0	0	0	0	0	0	0	0
256	Springleaf	0	0	0	0	0	0	0	0	0	0	0	0
257	Straits View	0	0	0	0	0	0	0	0	0	0	0	0
258	Sudong	0	0	0	0	0	0	0	0	0	0	0	0
259	Sungei Road	0	0	0	0	0	0	0	0	5	25	0	0
260	Sunset Way	0	0	0	0	0	0	0	0	0	0	0	0
261	Swiss Club	0	0	0	0	0	0	0	0	0	0	0	0
262	Tagore	0	0	0	0	0	0	0	0	0	0	0	0
263	Tai Seng	0	0	3	13	12	25	91	70	0	0	0	0
264	Taman Jurong	9	0	0	7	5	4	1	3	0	4	0	0
265	Tampines East	11	9	5	0	0	14	42	27	4	8	2	2
266	Tampines North	0	0	0	0	0	0	0	0	0	0	0	0
267	Tampines West	10	0	4	0	0	0	13	8	0	27	2	8
268	Tanglin	0	0	0	0	0	0	0	0	0	0	0	0
269	Tanglin Halt	0	2	0	13	10	0	2	0	0	0	0	0
270	Tanjong Irau	0	0	0	0	0	0	0	0	0	0	0	0
271	Tanjong Pagar	0	0	0	0	0	0	0	0	0	0	0	0
272	Tanjong Rhu	0	0	0	0	0	0	1	1	0	0	0	0
273	Teban Gardens	1	0	0	0	0	0	1	0	0	0	0	0
274	Teck Whye	0	0	0	0	0	0	6	8	1	5	0	0
275	Telok Blangah Drive	0	0	0	0	0	0	1	2	0	0	0	0
276	Telok Blangah Rise	2	0	0	0	0	1	0	6	0	0	0	0
277	Telok Blangah Way	0	0	0	0	0	1	0	0	0	0	0	0
278	Tengah	0	0	0	0	0	0	0	0	0	0	0	0
279	Tengeh	0	0	0	0	0	0	0	0	0	0	0	0
280	The Wharves	0	0	0	0	0	0	0	0	0	0	0	0
281	Tiong Bahru	0	0	0	0	0	0	0	0	0	0	2	0
282	Tiong Bahru Station	0	0	0	0	0	0	0	0	0	4	0	0
283	Toa Payoh Central	1	2	3	0	0	0	8	2	0	10	0	0
284	Toa Payoh West	2	0	0	0	0	0	5	2	0	0	0	2
285	Toh Guan	0	0	0	0	0	0	2	0	0	0	0	0
286	Toh Tuck	0	0	0	0	0	0	0	0	0	0	0	0
287	Townsville	0	0	0	0	0	0	0	2	0	0	0	4
288	Trafalgar	0	3	0	0	1	2	5	0	4	14	0	0
289	Tuas Bay	0	0	0	0	0	0	0	0	0	0	0	0
290	Tuas North	0	0	0	0	0	0	0	0	0	0	0	0
291	Tuas Promenade	0	0	0	0	0	0	0	0	0	0	0	0
292	Tuas View	0	0	0	0	0	0	0	0	0	0	0	0
293	Tuas View Extension	0	0	0	0	0	0	0	0	0	0	0	0
294	Tukang	0	0	0	0	0	0	0	0	0	0	0	0
295	Turf Club	0	0	0	0	0	0	0	0	0	0	0	0
296	Tyersall	0	0	0	0	2	3	3	0	0	0	0	0
297	Ulu Pandan	0	0	0	0	0	0	0	0	0	0	0	0
298	Upper Paya Lebar	32	8	5	31	35	51	16	18	6	5	0	2
299	Upper Thomson	0	0	1	0	0	2	2	2	5	18	0	4
300	Victoria	0	0	0	0	0	0	0	0	0	0	0	0
301	Waterway East	0	0	0	0	0	0	0	2	0	0	0	0
302	Wenya	0	2	0	0	0	0	2	0	0	0	0	0
303	West Coast	0	0	0	0	0	0	0	0	0	0	0	0
304	Western Water Catchment	0	0	0	0	0	0	0	1	0	0	0	0
305	Woodgrove	3	11	2	0	0	0	0	0	2	0	0	0
306	Woodlands East	1	1	0	0	0	1	11	33	3	3	0	0
307	Woodlands Regional Centre	0	0	0	0	0	0	0	0	0	0	0	0
308	Woodlands South	2	3	0	0	0	0	2	0	8	8	0	0
309	Woodlands West	2	0	0	0	0	0	0	0	0	0	0	0
310	Woodleigh	0	1	0	0	0	0	2	3	0	0	0	0
311	Xilin	0	0	0	0	0	0	1	1	0	1	0	0
312	Yew Tee	4	0	0	0	0	0	15	29	4	4	0	11
313	Yio Chu Kang	0	0	0	0	0	0	0	0	0	0	0	0
314	Yio Chu Kang East	0	1	0	0	1	1	10	4	5	4	2	9
315	Yio Chu Kang North	0	0	0	0	0	0	0	0	0	0	0	0
316	Yio Chu Kang West	0	0	0	0	0	0	0	0	0	0	0	0
317	Yishun Central	0	0	0	0	0	0	0	0	0	0	0	0
318	Yishun East	5	4	2	0	0	0	6	4	4	6	0	0
319	Yishun South	16	2	0	0	0	0	6	10	0	6	0	2
320	Yishun West	55	2	2	0	0	0	20	9	2	0	0	4
321	Yuhua East	0	0	0	0	0	0	0	0	0	8	0	0
322	Yuhua West	0	0	0	0	0	0	0	0	0	0	4	2
323	Yunnan	0	0	0	0	0	0	8	3	0	5	0	11
		532	245	167	262	230	478	2278	2036	555	893	90	567
	Total case count	8333
	Monthly Avg.	694.417

## Sheet: 2015
S.No	SUBZONE_Name	Jan	Feb	March	April	May	June	July	Aug	Sep	Oct	Nov	Dec
1	Admiralty	0	0	0	0	0	0	4	2	0	0	2	0
2	Airport Road	0	0	0	0	0	0	0	0	0	0	0	0
3	Alexandra Hill	2	1	0	0	0	0	0	0	0	0	0	0
4	Alexandra North	0	0	0	0	0	0	0	0	0	0	0	0
5	Aljunied	52	25	29	56	3	14	8	14	24	6	13	64
6	Anak Bukit	2	0	0	0	0	0	0	4	0	6	0	0
7	Anchorvale	0	0	4	0	0	0	0	2	9	0	0	2
8	Ang Mo Kio Town Centre	0	0	0	0	0	0	0	0	0	0	0	0
9	Anson	0	0	0	0	0	0	0	0	0	0	0	0
10	Balestier	8	2	0	0	1	2	0	0	19	18	25	1
11	Bangkit	0	9	0	0	0	0	4	2	6	0	0	5
12	Bayfront Subzone	0	0	0	0	0	0	0	0	0	0	0	0
13	Bayshore	0	0	4	0	0	0	0	0	0	0	0	0
14	Bedok North	6	16	18	0	2	7	5	17	16	10	11	6
15	Bedok Reservoir	0	0	0	0	0	0	2	0	4	3	0	0
16	Bedok South	10	14	6	0	4	2	12	28	76	78	57	63
17	Bencoolen	0	0	0	0	0	0	2	0	0	0	0	0
18	Bendemeer	1	2	2	0	3	0	2	2	10	13	5	34
19	Benoi Sector	0	0	0	0	0	0	0	0	0	0	0	0
20	Bidadari	0	0	0	0	0	0	0	0	0	0	0	0
21	Bishan East	48	80	26	0	0	2	0	0	11	0	0	0
22	Boat Quay	0	0	0	0	0	0	0	0	0	0	0	0
23	Boon Keng	3	4	1	0	0	0	0	0	2	0	0	14
24	Boon Lay Place	0	5	2	0	0	0	2	10	8	6	0	0
25	Boon Teck	0	3	3	0	0	0	0	0	0	2	1	0
26	Boulevard	0	0	0	0	0	0	0	0	0	0	0	0
27	Braddell	0	0	2	0	0	0	0	0	0	0	0	1
28	Bras Basah	0	0	0	0	0	0	0	0	0	0	0	0
29	Brickworks	0	0	0	0	0	0	0	0	0	0	0	0
30	Bugis	0	0	0	0	2	0	0	6	0	0	0	0
31	Bukit Batok Central	0	0	2	2	0	0	0	0	4	0	0	0
32	Bukit Batok East	0	0	0	0	0	0	5	3	0	0	4	0
33	Bukit Batok South	0	0	0	0	0	0	0	0	0	0	0	0
34	Bukit Batok West	2	0	2	2	0	2	2	0	0	0	0	0
35	Bukit Ho Swee	0	0	0	0	0	0	0	0	0	0	0	0
36	Bukit Merah	2	0	0	0	0	0	0	0	0	0	1	0
37	Cairnhill	0	0	0	0	0	0	0	0	0	0	0	0
38	Cecil	0	0	0	0	0	0	0	0	0	0	0	0
39	Central Subzone	0	0	0	0	0	0	0	0	0	0	0	0
40	Central Water Catchment	0	0	0	0	0	0	0	0	0	0	0	0
41	Changi Airport	0	0	0	0	0	0	0	0	0	0	0	0
42	Changi Bay	0	0	0	0	0	0	0	0	0	0	0	0
43	Changi Point	0	0	0	0	0	0	0	0	0	0	0	0
44	Changi West	0	0	0	0	0	0	0	0	0	0	0	0
45	Chatsworth	1	0	0	0	0	0	2	0	0	4	0	0
46	Cheng San	0	0	0	0	0	1	4	0	0	4	0	5
47	Chin Bee	0	0	0	0	0	0	0	0	0	0	0	0
48	China Square	0	0	0	0	0	0	0	0	0	0	0	0
49	Chinatown	0	0	0	0	0	0	0	0	0	0	0	0
50	Choa Chu Kang Central	0	0	0	0	0	0	0	0	0	1	0	0
51	Choa Chu Kang North	7	10	4	0	0	0	2	10	4	1	4	4
52	Chong Boon	5	9	2	0	0	2	0	0	9	22	5	0
53	City Hall	0	0	5	2	0	0	0	0	0	0	0	0
54	City Terminals	0	0	0	0	0	0	0	0	0	0	0	0
55	Clarke Quay	0	0	0	0	0	0	0	0	0	0	0	0
56	Clementi Central	0	0	0	0	0	0	0	0	0	0	1	0
57	Clementi North	0	0	0	4	0	0	0	14	16	2	0	0
58	Clementi West	5	12	3	0	0	0	0	0	0	0	0	0
59	Clementi Woods	0	0	0	0	0	0	0	0	0	0	2	0
60	Clifford Pier	0	0	0	0	0	0	0	0	0	0	0	0
61	Commonwealth	0	0	0	0	0	0	0	0	0	0	0	0
62	Compassvale	4	2	0	0	0	0	2	0	0	0	0	4
63	Coney Island	0	0	0	0	0	0	0	0	0	0	0	0
64	Coronation Road	0	0	0	0	0	0	0	0	0	0	0	0
65	Crawford	0	0	0	0	0	0	0	6	0	0	4	5
66	Dairy Farm	0	0	0	0	0	0	0	0	0	0	0	0
67	Defu Industrial Park	0	0	0	0	0	0	0	0	0	0	0	0
68	Depot Road	0	0	0	0	0	0	0	0	0	0	0	0
69	Dhoby Ghaut	0	2	0	0	0	0	0	0	0	0	0	0
70	Dover	0	0	0	1	0	0	0	0	0	0	0	4
71	Dunearn	0	0	0	0	0	0	0	0	0	0	0	0
72	East Coast	0	0	0	0	0	0	0	0	0	0	0	0
73	Everton Park	0	0	0	0	0	0	1	0	0	0	0	0
74	Faber	0	0	0	0	0	0	0	0	0	0	0	0
75	Fajar	0	0	0	0	2	0	0	0	6	0	0	0
76	Farrer Court	0	0	0	0	0	0	1	0	0	0	2	0
77	Farrer Park	0	0	0	0	0	0	2	25	16	20	8	10
78	Fernvale	0	2	0	0	0	0	0	2	2	5	2	0
79	Flora Drive	0	2	4	10	15	16	21	17	4	0	0	0
80	Fort Canning	0	0	0	0	0	0	0	0	0	0	0	0
81	Frankel	13	23	12	0	11	6	12	69	87	61	42	39
82	Gali Batu	0	0	0	0	0	0	0	0	0	0	0	0
83	Geylang Bahru	0	0	0	0	0	0	2	6	6	6	11	6
84	Geylang East	8	12	5	20	31	9	3	17	10	4	13	34
85	Ghim Moh	0	0	0	0	0	0	3	0	0	0	0	0
86	Gombak	0	2	0	0	0	0	0	0	0	0	0	0
87	Goodwood Park	0	0	0	0	0	0	0	0	0	2	0	0
88	Greenwood Park	0	0	0	0	0	0	0	0	0	0	0	0
89	Guilin	0	0	0	0	0	0	0	0	0	0	0	0
90	Gul Basin	0	0	0	0	0	0	0	0	0	0	0	0
91	Gul Circle	0	0	0	0	0	0	0	0	0	0	0	0
92	Henderson Hill	0	0	0	0	0	0	0	0	0	0	0	0
93	Hillcrest	0	0	0	0	0	0	0	0	0	0	0	0
94	Hillview	4	0	0	1	0	0	0	0	0	0	0	0
95	Holland Drive	0	0	0	0	0	0	0	0	0	0	0	0
96	Holland Road	0	0	0	0	0	0	1	0	0	1	0	0
97	Hong Kah	0	3	8	0	1	0	2	20	8	1	15	13
98	Hong Kah North	2	3	0	0	0	0	0	0	12	11	0	0
99	Hougang Central	0	7	9	0	0	0	0	0	2	4	4	0
100	Hougang East	21	5	0	0	3	3	1	1	10	2	0	0
101	Hougang West	1	0	6	0	0	0	0	6	18	3	13	4
102	Institution Hill	0	0	0	0	0	0	0	0	0	0	0	0
103	International Business Park	0	0	0	0	0	0	0	0	0	0	0	0
104	Istana Negara	0	0	0	0	0	0	0	0	0	0	0	0
105	Jelebu	0	0	0	0	0	0	0	4	3	0	1	8
106	Joo Koon	0	0	0	0	0	0	0	0	0	0	0	0
107	Joo Seng	0	0	0	0	0	1	1	15	26	0	0	0
108	Jurong Gateway	0	0	0	0	0	0	0	0	0	0	0	0
109	Jurong Island And Bukom	0	0	0	0	0	0	0	0	0	0	0	0
110	Jurong Port	0	0	0	0	0	0	0	0	0	0	0	0
111	Jurong River	0	0	0	0	0	0	1	0	0	0	0	0
112	Jurong West Central	2	0	0	8	0	0	3	0	0	3	0	4
113	Kaki Bukit	0	0	0	3	1	2	0	7	10	6	11	2
114	Kallang Bahru	1	0	0	0	0	0	0	0	0	4	1	1
115	Kallang Way	0	0	0	0	0	0	0	0	0	0	0	0
116	Kampong Bugis	2	0	1	0	0	0	0	0	0	0	0	1
117	Kampong Glam	0	0	0	0	0	0	0	0	0	0	0	0
118	Kampong Java	4	0	0	0	0	0	0	0	0	10	62	71
119	Kampong Tiong Bahru	0	0	0	0	0	0	2	0	0	0	0	2
120	Kampong Ubi	0	0	0	0	3	0	0	2	6	0	0	0
121	Kangkar	0	4	1	0	3	7	14	21	88	4	8	0
122	Katong	6	0	2	0	0	0	1	9	28	49	10	14
123	Keat Hong	0	0	0	0	0	0	3	0	0	1	0	0
124	Kebun Bahru	2	3	0	0	0	0	2	6	4	0	3	0
125	Kembangan	6	2	2	1	4	0	6	16	8	2	6	8
126	Kent Ridge	0	0	0	0	0	0	0	0	0	0	0	0
127	Khatib	0	0	20	40	9	0	9	23	34	21	1	0
128	Kian Teck	0	0	0	0	0	0	0	0	0	0	0	0
129	Kim Keat	0	0	0	0	0	0	0	0	0	3	3	0
130	Kovan	26	8	9	10	0	2	5	28	9	4	21	41
131	Kranji	0	0	0	0	0	1	0	0	0	0	0	0
132	Lakeside	0	0	0	0	0	0	0	2	0	0	0	0
133	Lavender	0	0	1	0	0	3	0	10	29	7	21	31
134	Leedon Park	0	0	0	0	0	0	4	0	4	4	0	0
135	Leonie Hill	0	0	0	0	0	0	0	0	0	0	0	0
136	Lim Chu Kang	0	0	0	0	0	0	0	0	0	0	0	0
137	Little India	1	0	0	0	0	0	2	9	12	14	8	2
138	Liu Fang	0	0	0	0	0	0	0	0	0	0	0	0
139	Lorong 8 Toa Payoh	0	1	2	2	0	2	0	0	0	1	8	4
140	Lorong Ah Soo	0	1	1	3	0	0	1	5	8	2	8	3
141	Lorong Chuan	1	0	0	1	1	0	1	3	4	4	3	7
142	Lorong Halus	0	0	0	0	0	0	0	0	0	0	0	0
143	Lorong Halus North	0	0	0	0	0	0	0	0	0	0	0	0
144	Lower Seletar	0	0	0	0	0	0	0	0	0	0	0	0
145	Loyang East	0	0	0	0	0	0	4	0	0	4	0	0
146	Loyang West	0	0	0	0	0	1	0	0	0	0	0	0
147	Mackenzie	0	0	0	0	0	0	0	0	0	0	0	0
148	Macpherson	0	0	0	0	0	2	2	6	0	7	0	0
149	Malcolm	0	0	0	0	0	0	0	2	0	0	0	0
150	Mandai East	0	0	0	0	0	0	0	0	0	0	0	0
151	Mandai Estate	0	0	4	8	0	0	0	0	6	0	0	2
152	Mandai West	0	0	0	0	0	0	0	0	0	0	0	0
153	Margaret Drive	0	0	0	0	0	0	1	0	0	0	0	0
154	Marina Centre	0	0	0	0	0	0	0	0	0	0	0	0
155	Marina East	0	0	0	0	0	0	0	0	0	0	0	0
156	Marina East (Mp)	0	0	0	0	0	0	0	0	0	0	0	0
157	Marina South	0	0	0	0	0	0	0	0	0	0	0	0
158	Marine Parade	1	0	0	4	0	0	0	4	0	0	0	0
159	Maritime Square	0	0	0	2	0	0	0	0	0	0	0	0
160	Marymount	20	8	23	18	5	79	234	209	50	32	15	2
161	Matilda	0	0	0	2	0	0	0	2	7	0	0	2
162	Maxwell	0	0	0	0	0	0	0	0	0	0	0	0
163	Mei Chin	0	4	4	0	0	0	0	0	0	0	0	0
164	Midview	5	0	3	0	0	1	7	31	0	2	6	5
165	Monk'S Hill	0	0	0	0	0	0	0	0	0	0	0	0
166	Moulmein	2	0	0	0	0	0	2	0	0	4	0	5
167	Mount Emily	0	0	0	0	0	0	0	0	0	0	0	0
168	Mount Pleasant	0	0	0	0	0	0	0	0	0	0	0	0
169	Mountbatten	0	0	0	0	0	0	0	0	2	0	0	0
170	Nassim	0	0	0	0	0	5	0	2	4	2	0	0
171	National University Of S'Pore	0	0	0	0	0	0	0	0	0	0	0	0
172	Nature Reserve	0	0	0	0	0	0	0	0	0	0	0	0
173	Nee Soon	0	0	0	0	0	0	0	0	0	0	0	0
174	Newton Circus	0	0	0	0	0	0	0	0	0	0	0	0
175	North Coast	0	0	0	2	0	0	0	0	0	0	0	2
176	North-Eastern Islands	0	0	0	0	0	0	0	0	0	0	0	0
177	Northland	0	0	0	0	0	1	3	20	16	21	0	6
178	Northshore	0	0	0	0	0	0	0	0	0	0	0	0
179	One North	0	0	0	0	0	0	0	4	0	0	0	0
180	One Tree Hill	0	0	0	0	0	0	0	0	0	0	0	0
181	Orange Grove	0	0	0	0	0	0	0	0	0	0	0	0
182	Oxley	0	0	0	0	0	0	0	0	0	0	0	0
183	Pandan	0	0	0	0	0	0	0	0	0	0	0	0
184	Pang Sua	4	0	0	0	0	0	0	0	0	0	0	1
185	Pasir Panjang 1	0	1	0	0	0	0	0	0	0	0	0	0
186	Pasir Panjang 2	0	0	0	0	0	0	0	0	0	0	0	0
187	Pasir Ris Central	5	0	0	0	0	0	0	6	12	71	21	4
188	Pasir Ris Drive	31	8	1	4	2	1	9	10	0	2	36	70
189	Pasir Ris Park	16	12	2	2	0	0	1	2	0	0	0	2
190	Pasir Ris Wafer Fab Park	0	0	0	0	0	0	0	0	0	0	0	0
191	Pasir Ris West	0	0	0	0	0	0	0	2	14	12	0	1
192	Paterson	0	0	0	0	0	0	0	0	0	0	0	0
193	Paya Lebar East	0	0	0	0	0	0	0	0	0	0	0	0
194	Paya Lebar North	0	0	0	0	0	0	0	0	0	0	0	0
195	Paya Lebar West	0	0	0	2	0	0	0	0	0	0	0	0
196	Pearl'S Hill	0	0	0	0	0	0	0	0	0	0	0	0
197	Pei Chun	0	13	0	0	0	0	0	0	0	1	0	0
198	Peng Siang	0	0	6	0	0	3	0	0	0	0	0	0
199	Penjuru Crescent	0	0	0	0	0	0	0	0	0	0	0	0
200	People'S Park	0	0	0	0	0	0	0	0	0	0	0	0
201	Phillip	0	0	0	0	0	0	0	0	0	0	0	0
202	Pioneer Sector	0	0	0	0	0	0	0	0	0	0	0	0
203	Plab	0	0	0	0	0	0	0	0	0	0	0	0
204	Port	0	0	0	0	0	0	0	0	0	0	0	0
205	Potong Pasir	0	0	4	0	0	0	0	0	0	0	0	0
206	Pulau Punggol Barat	0	0	0	2	0	0	0	0	0	0	0	0
207	Pulau Punggol Timor	0	0	0	0	0	0	0	0	0	0	0	0
208	Pulau Seletar	0	0	0	0	0	0	0	0	0	0	0	0
209	Punggol Canal	0	0	0	0	0	0	0	0	0	0	0	0
210	Punggol Field	6	0	0	0	0	0	8	7	0	0	4	0
211	Punggol Town Centre	0	0	0	0	0	0	2	0	0	0	0	0
212	Queensway	0	0	0	0	0	0	0	0	0	0	0	0
213	Raffles Place	0	0	0	0	0	0	0	0	0	0	0	0
214	Redhill	0	0	0	0	0	0	0	4	0	0	0	0
215	Reservoir View	1	0	0	0	0	0	0	0	0	0	0	0
216	Ridout	0	0	0	0	0	0	0	0	0	0	0	0
217	Rivervale	2	2	0	2	0	0	5	3	2	0	4	9
218	Robertson Quay	0	0	0	0	0	0	0	0	0	0	0	0
219	Rochor Canal	0	0	0	0	0	0	0	2	0	0	0	0
220	Safti	0	0	0	0	0	0	0	0	0	0	0	0
221	Samulun	0	0	0	0	0	0	0	0	0	0	0	0
222	Saujana	0	0	0	0	0	0	0	4	0	0	0	0
223	Selegie	0	0	0	0	0	0	0	0	0	0	0	0
224	Seletar	0	0	0	0	0	0	0	0	0	0	0	0
225	Seletar Aerospace Park	0	0	0	0	0	0	0	0	0	0	0	0
226	Seletar Hills	0	3	0	0	4	0	0	2	2	0	0	2
227	Semakau	0	0	0	0	0	0	0	0	0	0	0	0
228	Sembawang Central	1	0	0	0	0	2	0	6	2	4	0	7
229	Sembawang East	0	0	0	0	0	0	0	0	0	0	0	0
230	Sembawang Hills	0	0	0	0	0	0	0	0	0	0	0	0
231	Sembawang North	1	0	0	3	2	0	2	2	2	0	2	2
232	Sembawang Springs	0	6	1	14	10	2	24	33	15	8	5	2
233	Sembawang Straits	0	0	0	0	0	0	0	0	0	0	0	0
234	Sengkang Town Centre	6	4	2	0	1	2	4	0	4	9	0	10
235	Sengkang West	0	0	0	2	0	0	0	0	0	0	0	0
236	Senja	0	0	0	0	0	0	0	0	0	0	0	0
237	Sennett	0	0	0	0	0	0	0	1	12	23	4	0
238	Senoko North	0	0	0	0	0	0	0	0	0	0	0	0
239	Senoko South	0	0	0	0	0	0	0	2	0	0	1	0
240	Senoko West	0	0	0	0	0	0	0	0	0	0	0	5
241	Sentosa	0	0	0	0	0	0	0	0	0	0	0	0
242	Serangoon Central	0	0	4	4	0	0	6	4	2	1	23	39
243	Serangoon Garden	36	12	4	0	10	6	6	18	14	22	15	29
244	Serangoon North	0	0	0	0	0	0	0	0	1	2	12	0
245	Serangoon North Ind Estate	0	0	0	0	0	0	0	1	0	0	0	0
246	Shangri-La	4	2	9	0	0	1	1	10	8	0	0	6
247	Shipyard	0	0	0	0	0	0	0	0	0	0	0	0
248	Siglap	0	0	0	0	0	0	0	0	0	0	0	4
249	Simei	8	2	1	0	4	4	20	42	30	4	0	0
250	Simpang North	0	0	0	0	0	0	0	0	0	0	0	0
251	Simpang South	0	0	0	0	0	0	0	0	0	0	0	0
252	Singapore General Hospital	0	0	0	0	0	0	0	0	0	0	0	0
253	Singapore Polytechnic	0	0	0	0	0	0	0	0	0	0	0	0
254	Somerset	0	0	0	0	0	0	0	0	0	0	0	0
255	Southern Group	0	0	0	0	0	0	0	0	0	0	0	0
256	Springleaf	0	0	0	0	0	0	0	0	0	0	0	0
257	Straits View	0	0	0	0	0	0	0	0	0	0	0	0
258	Sudong	0	0	0	0	0	0	0	0	0	0	0	0
259	Sungei Road	0	0	0	0	0	0	0	0	0	0	2	0
260	Sunset Way	0	0	0	0	0	0	0	0	0	0	0	0
261	Swiss Club	0	0	0	0	0	0	0	0	0	0	0	0
262	Tagore	0	0	0	0	0	2	0	0	0	0	0	0
263	Tai Seng	2	0	1	0	0	4	0	0	16	0	0	0
264	Taman Jurong	0	0	4	0	0	4	2	6	4	0	1	0
265	Tampines East	8	7	2	8	4	2	18	9	22	68	40	10
266	Tampines North	0	0	0	0	0	0	0	0	0	0	0	0
267	Tampines West	0	7	2	0	0	2	11	20	10	17	38	89
268	Tanglin	0	0	0	0	0	0	0	0	0	0	0	0
269	Tanglin Halt	0	0	0	0	0	0	0	6	0	0	0	0
270	Tanjong Irau	0	0	0	0	0	0	0	0	0	0	0	0
271	Tanjong Pagar	0	0	0	0	0	0	0	0	0	4	0	0
272	Tanjong Rhu	0	0	0	0	0	0	0	0	0	0	0	2
273	Teban Gardens	0	2	0	0	0	0	0	0	0	6	0	0
274	Teck Whye	4	4	3	0	0	0	0	0	0	6	0	0
275	Telok Blangah Drive	0	0	0	0	0	0	0	0	0	6	0	0
276	Telok Blangah Rise	0	0	4	0	0	0	2	4	0	0	0	0
277	Telok Blangah Way	0	0	0	0	0	0	0	12	0	0	0	0
278	Tengah	0	0	0	0	0	0	0	0	0	0	0	0
279	Tengeh	0	0	0	0	0	0	0	0	0	0	0	0
280	The Wharves	0	0	0	0	0	0	0	0	0	0	0	0
281	Tiong Bahru	0	0	0	0	0	0	0	0	0	0	0	0
282	Tiong Bahru Station	0	0	0	0	0	0	0	0	0	0	0	0
283	Toa Payoh Central	14	3	5	0	0	0	5	13	0	0	1	1
284	Toa Payoh West	6	1	2	0	0	0	0	1	8	6	1	0
285	Toh Guan	0	0	0	0	0	0	0	0	0	0	0	0
286	Toh Tuck	0	0	0	0	0	0	0	0	0	0	0	0
287	Townsville	2	1	0	0	0	1	0	0	5	4	6	5
288	Trafalgar	1	0	2	0	0	0	1	11	35	29	18	14
289	Tuas Bay	0	0	0	0	0	0	0	0	0	0	0	0
290	Tuas North	0	0	0	0	0	0	0	0	0	0	0	0
291	Tuas Promenade	0	0	0	0	0	0	0	0	0	0	0	0
292	Tuas View	0	0	0	0	0	0	0	0	0	0	0	0
293	Tuas View Extension	0	0	0	0	0	0	0	0	0	0	0	0
294	Tukang	0	0	0	0	0	1	0	0	0	0	0	0
295	Turf Club	0	0	0	0	0	0	0	0	0	0	0	0
296	Tyersall	0	0	0	0	0	0	0	8	0	0	2	0
297	Ulu Pandan	0	0	0	0	0	0	0	4	0	0	0	0
298	Upper Paya Lebar	24	10	4	0	0	0	0	0	0	6	8	40
299	Upper Thomson	0	0	0	0	0	0	17	90	63	55	20	62
300	Victoria	0	0	0	0	0	0	0	0	0	0	0	0
301	Waterway East	0	0	4	0	0	1	2	0	0	0	0	0
302	Wenya	0	0	0	0	0	0	0	0	4	6	0	4
303	West Coast	0	0	0	0	0	0	0	0	6	12	7	0
304	Western Water Catchment	0	0	0	0	0	0	0	0	0	0	0	0
305	Woodgrove	0	0	0	0	0	0	2	0	0	0	0	0
306	Woodlands East	3	0	3	10	0	3	2	8	16	34	4	13
307	Woodlands Regional Centre	0	0	0	0	0	0	0	0	0	0	0	0
308	Woodlands South	0	1	13	4	0	0	24	18	4	0	0	0
309	Woodlands West	5	0	0	0	0	0	0	6	2	2	5	3
310	Woodleigh	0	0	0	0	0	0	0	0	0	0	0	0
311	Xilin	0	0	0	0	0	0	0	0	0	0	0	0
312	Yew Tee	2	0	3	0	1	0	2	0	0	0	1	2
313	Yio Chu Kang	0	0	0	0	0	0	0	0	0	0	0	0
314	Yio Chu Kang East	7	6	1	0	0	0	0	0	0	0	1	0
315	Yio Chu Kang North	0	0	0	0	0	0	0	0	0	0	0	0
316	Yio Chu Kang West	2	19	2	0	0	0	2	0	0	2	1	0
317	Yishun Central	0	0	0	0	0	0	0	0	0	0	0	0
318	Yishun East	0	0	0	0	0	2	1	6	13	4	0	11
319	Yishun South	0	0	0	0	2	10	29	20	27	10	6	18
320	Yishun West	3	6	22	6	6	5	24	74	185	82	21	7
321	Yuhua East	0	0	0	0	0	2	2	0	8	1	0	4
322	Yuhua West	0	0	0	0	1	0	4	23	0	0	2	0
323	Yunnan	40	7	14	0	0	2	0	0	12	8	7	5
		530	425	357	265	151	235	653	1223	1317	1034	760	1024	7974	Total
														664.5	monthly avg.

## Sheet: 2016
S.No	SUBZONE_Name	Jan	Feb	March	April	May	June	July	Aug	Sep	Oct	Nov	Dec
1	Admiralty	0	4	0	0	2	3	0	0	0	1	0	0
2	Airport Road	0	0	0	0	0	0	0	0	0	0	0	0
3	Alexandra Hill	3	0	0	0	0	0	2	0	0	0	0	0
4	Alexandra North	0	0	0	0	0	0	0	0	0	0	0	0
5	Aljunied	142	220	65	119	119	109	34	36	34	27	2	5
6	Anak Bukit	0	1	4	1	0	0	4	10	2	0	0	0
7	Anchorvale	0	2	3	0	0	0	2	0	2	2	0	0
8	Ang Mo Kio Town Centre	0	0	0	0	0	0	0	0	0	0	0	0
9	Anson	0	0	0	0	0	0	0	0	0	0	0	0
10	Balestier	17	24	7	2	6	15	8	6	4	1	1	0
11	Bangkit	38	25	15	0	0	0	0	6	8	5	0	13
12	Bayfront Subzone	0	0	0	0	0	0	0	0	0	0	0	0
13	Bayshore	0	0	2	0	0	0	2	0	4	2	0	0
14	Bedok North	42	30	16	11	8	0	0	14	15	7	7	4
15	Bedok Reservoir	5	5	2	0	0	0	0	0	0	2	0	0
16	Bedok South	84	59	16	0	1	2	25	116	70	6	2	3
17	Bencoolen	0	0	4	0	0	0	0	0	0	0	0	0
18	Bendemeer	66	53	64	40	9	0	0	8	9	3	0	0
19	Benoi Sector	0	0	0	0	0	0	0	0	0	0	0	0
20	Bidadari	0	2	0	0	0	0	0	1	0	0	0	0
21	Bishan East	2	6	22	0	0	0	2	0	4	0	4	0
22	Boat Quay	2	0	0	0	0	0	0	0	0	0	0	0
23	Boon Keng	26	36	14	8	2	0	0	1	0	0	0	2
24	Boon Lay Place	6	0	0	2	0	0	0	0	0	0	0	0
25	Boon Teck	0	11	6	17	9	2	3	0	1	0	2	0
26	Boulevard	0	0	0	0	0	0	0	0	0	0	0	0
27	Braddell	3	3	5	0	1	0	0	0	0	0	0	0
28	Bras Basah	0	0	0	0	0	0	0	0	0	0	0	0
29	Brickworks	0	0	0	0	0	0	0	0	0	0	0	0
30	Bugis	0	1	0	0	0	0	0	4	2	0	0	0
31	Bukit Batok Central	0	0	2	0	0	0	0	0	2	6	0	1
32	Bukit Batok East	0	3	0	0	0	0	0	0	0	0	0	2
33	Bukit Batok South	2	0	4	2	6	0	0	0	0	0	0	1
34	Bukit Batok West	0	0	0	3	0	0	0	0	0	0	0	0
35	Bukit Ho Swee	2	6	5	0	0	0	0	0	2	0	0	0
36	Bukit Merah	0	0	0	0	0	0	0	0	0	0	0	0
37	Cairnhill	0	0	2	0	0	0	0	0	0	0	0	0
38	Cecil	0	0	0	0	0	0	0	0	0	0	0	0
39	Central Subzone	1	0	0	0	0	0	0	0	0	0	0	0
40	Central Water Catchment	0	1	1	0	0	4	0	0	2	0	0	0
41	Changi Airport	0	0	0	0	0	0	0	0	0	0	0	0
42	Changi Bay	0	0	0	0	0	0	0	0	0	0	0	0
43	Changi Point	0	0	0	0	0	0	0	0	0	0	0	0
44	Changi West	0	0	0	0	0	0	0	0	0	0	0	0
45	Chatsworth	0	0	0	0	0	0	2	0	0	0	0	0
46	Cheng San	6	28	14	3	0	0	4	9	0	0	0	0
47	Chin Bee	0	0	0	0	0	0	0	0	0	0	0	0
48	China Square	2	0	0	0	0	0	0	0	0	0	0	0
49	Chinatown	0	0	1	0	0	0	0	0	1	0	0	0
50	Choa Chu Kang Central	0	0	2	0	0	0	0	6	2	2	0	0
51	Choa Chu Kang North	7	0	9	0	0	3	0	0	8	4	0	0
52	Chong Boon	15	30	29	5	0	3	17	41	0	2	0	2
53	City Hall	0	0	0	0	0	0	0	0	0	0	0	0
54	City Terminals	0	0	0	0	0	0	0	0	0	0	0	0
55	Clarke Quay	0	0	0	0	0	0	0	0	0	0	0	0
56	Clementi Central	0	0	0	0	0	0	0	0	0	0	0	0
57	Clementi North	2	2	0	2	2	0	0	6	16	0	2	0
58	Clementi West	0	0	2	2	0	0	0	7	4	0	0	0
59	Clementi Woods	2	2	0	0	0	0	0	0	0	0	0	0
60	Clifford Pier	0	0	0	0	0	0	0	0	0	0	0	0
61	Commonwealth	0	1	0	0	0	0	0	0	0	0	0	0
62	Compassvale	0	5	3	0	2	0	0	2	3	0	0	0
63	Coney Island	0	0	0	0	0	0	0	0	0	0	0	0
64	Coronation Road	0	0	0	0	0	0	0	0	0	0	0	0
65	Crawford	3	0	0	7	5	0	0	1	3	0	0	0
66	Dairy Farm	1	0	0	0	0	0	1	1	9	2	0	1
67	Defu Industrial Park	1	1	0	0	0	0	0	0	0	0	0	0
68	Depot Road	0	0	0	0	0	0	0	0	0	0	0	0
69	Dhoby Ghaut	0	0	0	0	0	0	0	0	0	0	0	0
70	Dover	1	0	1	0	0	0	0	0	0	0	0	0
71	Dunearn	0	2	30	2	3	0	0	0	0	0	0	0
72	East Coast	0	0	0	0	0	0	0	0	0	0	0	0
73	Everton Park	0	1	2	0	2	0	2	0	0	0	0	0
74	Faber	0	0	0	0	0	0	0	0	0	0	0	0
75	Fajar	4	3	0	0	2	10	0	0	0	0	0	0
76	Farrer Court	0	0	0	0	0	0	0	0	1	0	0	0
77	Farrer Park	7	5	2	0	0	0	0	0	0	0	0	0
78	Fernvale	4	0	4	0	5	13	32	2	4	0	0	0
79	Flora Drive	0	0	4	0	0	2	7	10	7	6	0	0
80	Fort Canning	0	0	0	0	0	0	0	0	0	0	0	0
81	Frankel	101	160	199	103	80	45	112	125	89	41	2	2
82	Gali Batu	0	0	0	1	0	0	0	0	0	0	0	0
83	Geylang Bahru	6	35	63	70	46	0	0	0	0	0	0	0
84	Geylang East	39	61	80	39	33	12	14	5	7	0	0	0
85	Ghim Moh	0	0	0	0	0	0	0	0	0	0	0	0
86	Gombak	1	0	0	0	0	0	0	2	0	0	0	0
87	Goodwood Park	0	0	0	0	0	0	0	0	0	0	0	0
88	Greenwood Park	0	0	0	0	0	0	0	0	0	0	0	0
89	Guilin	0	0	0	0	0	0	0	0	0	0	0	0
90	Gul Basin	0	0	0	0	0	0	0	0	0	0	0	0
91	Gul Circle	0	0	0	0	0	0	0	0	0	0	0	0
92	Henderson Hill	0	4	0	0	0	0	0	0	0	0	0	0
93	Hillcrest	0	0	0	1	0	0	0	0	0	0	0	0
94	Hillview	0	2	0	0	0	0	0	0	0	0	0	0
95	Holland Drive	3	6	2	0	0	0	0	0	0	0	0	0
96	Holland Road	0	0	2	0	0	0	0	1	0	0	0	0
97	Hong Kah	16	12	3	0	0	0	0	2	2	3	0	0
98	Hong Kah North	3	2	0	0	0	0	0	0	0	0	0	0
99	Hougang Central	0	0	7	4	0	0	0	0	0	0	0	0
100	Hougang East	5	11	0	2	6	10	0	0	8	6	11	16
101	Hougang West	18	27	78	64	38	8	4	0	0	1	9	2
102	Institution Hill	0	0	0	0	0	0	0	0	0	0	0	0
103	International Business Park	0	0	0	0	0	0	0	0	0	0	0	0
104	Istana Negara	0	0	0	0	0	0	0	0	0	0	0	0
105	Jelebu	3	9	2	0	2	0	5	22	28	14	0	4
106	Joo Koon	0	0	0	0	0	0	0	0	0	0	0	0
107	Joo Seng	4	14	15	12	2	8	1	7	3	1	0	0
108	Jurong Gateway	0	0	0	0	0	0	0	0	0	0	0	0
109	Jurong Island And Bukom	0	1	4	0	0	0	0	0	0	0	0	0
110	Jurong Port	0	0	0	0	0	0	0	0	0	0	0	0
111	Jurong River	0	1	0	1	0	0	0	0	0	0	0	0
112	Jurong West Central	7	23	7	1	2	4	0	0	6	0	2	0
113	Kaki Bukit	4	16	39	34	24	12	18	32	9	6	6	0
114	Kallang Bahru	0	5	2	4	1	0	0	2	0	0	0	0
115	Kallang Way	0	0	2	0	1	0	0	0	1	0	0	0
116	Kampong Bugis	2	3	0	0	0	1	2	0	0	0	0	0
117	Kampong Glam	0	0	0	0	0	0	0	0	0	0	0	0
118	Kampong Java	92	28	5	0	2	0	2	3	0	0	0	2
119	Kampong Tiong Bahru	4	0	0	0	0	0	0	0	0	0	0	0
120	Kampong Ubi	5	10	3	4	2	2	2	0	0	0	0	0
121	Kangkar	2	10	2	2	0	4	2	0	4	0	0	2
122	Katong	18	35	40	1	3	1	0	4	4	2	0	0
123	Keat Hong	3	0	0	0	0	0	0	0	0	0	0	0
124	Kebun Bahru	3	6	9	6	2	0	0	2	2	0	0	0
125	Kembangan	32	32	0	0	5	23	35	21	7	15	0	0
126	Kent Ridge	0	0	0	0	0	0	0	0	0	0	0	0
127	Khatib	0	2	0	0	0	0	0	0	0	0	0	0
128	Kian Teck	0	0	0	0	0	0	0	0	0	0	0	0
129	Kim Keat	0	0	0	0	0	0	0	6	0	2	0	0
130	Kovan	88	116	47	7	2	0	0	0	0	0	2	20
131	Kranji	0	2	1	0	0	0	0	0	0	0	0	0
132	Lakeside	0	0	0	0	0	0	0	0	0	0	0	0
133	Lavender	55	26	5	7	0	4	21	42	6	13	11	0
134	Leedon Park	5	5	0	0	0	0	0	0	1	0	0	0
135	Leonie Hill	0	0	0	0	0	0	0	0	0	0	0	0
136	Lim Chu Kang	0	0	0	0	0	0	0	0	0	0	0	0
137	Little India	17	14	2	0	0	0	8	0	0	0	0	0
138	Liu Fang	0	0	0	0	0	0	0	0	0	0	0	0
139	Lorong 8 Toa Payoh	0	1	6	3	2	3	0	0	0	0	0	0
140	Lorong Ah Soo	21	29	26	9	3	5	8	11	0	3	2	4
141	Lorong Chuan	24	20	16	8	0	0	0	2	0	0	0	0
142	Lorong Halus	0	0	0	0	0	0	0	0	0	0	0	0
143	Lorong Halus North	0	0	0	0	0	0	0	0	0	0	0	0
144	Lower Seletar	0	3	0	0	2	0	0	0	0	0	0	0
145	Loyang East	0	0	0	2	2	0	0	0	0	0	1	0
146	Loyang West	0	0	0	0	0	0	0	0	0	0	0	0
147	Mackenzie	0	0	0	0	0	0	0	0	0	0	0	0
148	Macpherson	6	14	15	0	6	3	0	20	57	49	0	0
149	Malcolm	0	0	1	0	0	0	0	0	0	0	0	0
150	Mandai East	0	0	0	0	0	0	0	0	0	0	0	0
151	Mandai Estate	0	0	0	0	0	0	0	0	0	0	0	0
152	Mandai West	0	0	0	0	0	0	0	0	0	0	0	0
153	Margaret Drive	0	0	0	0	0	0	0	0	0	2	0	0
154	Marina Centre	0	0	0	0	0	0	0	0	0	0	0	0
155	Marina East	0	0	0	0	0	0	0	0	0	0	0	0
156	Marina East (Mp)	0	0	0	0	0	0	0	0	0	0	0	0
157	Marina South	0	0	0	0	0	0	0	0	0	0	0	0
158	Marine Parade	6	10	7	1	3	5	5	7	2	3	0	0
159	Maritime Square	0	0	1	1	0	0	0	0	1	0	0	0
160	Marymount	1	11	7	0	0	0	0	2	0	0	0	0
161	Matilda	3	3	2	0	0	1	0	0	1	0	0	0
162	Maxwell	0	0	0	0	0	0	0	0	0	0	0	0
163	Mei Chin	6	0	0	0	0	0	0	0	0	0	0	0
164	Midview	10	11	7	2	0	14	35	10	2	2	0	0
165	Monk'S Hill	0	0	0	0	0	0	0	0	0	0	0	0
166	Moulmein	6	8	10	2	0	0	0	0	0	0	0	2
167	Mount Emily	0	0	0	0	1	0	0	0	0	0	0	0
168	Mount Pleasant	0	0	0	0	0	0	0	0	0	0	0	0
169	Mountbatten	11	16	16	16	8	3	1	0	4	0	0	0
170	Nassim	0	0	17	0	0	0	0	0	2	0	0	0
171	National University Of S'Pore	0	0	0	0	0	0	0	0	0	0	0	0
172	Nature Reserve	0	0	0	0	0	1	1	0	0	0	0	0
173	Nee Soon	0	0	0	0	0	0	0	0	0	0	0	0
174	Newton Circus	0	0	2	0	0	0	0	0	0	0	0	0
175	North Coast	5	0	7	1	0	0	0	0	0	0	0	0
176	North-Eastern Islands	0	0	0	0	0	0	0	0	0	0	0	0
177	Northland	2	8	10	7	5	0	7	7	2	0	0	0
178	Northshore	0	0	0	0	0	0	0	0	0	0	0	0
179	One North	0	0	0	0	0	0	0	0	0	0	0	0
180	One Tree Hill	0	0	0	0	0	0	0	0	0	0	0	0
181	Orange Grove	0	0	0	0	0	0	0	0	0	0	0	0
182	Oxley	0	0	0	0	0	0	0	0	0	0	0	0
183	Pandan	0	0	0	0	0	0	0	0	0	0	0	0
184	Pang Sua	0	0	0	0	0	0	0	0	0	0	0	0
185	Pasir Panjang 1	0	0	0	4	0	0	3	3	2	0	0	0
186	Pasir Panjang 2	0	0	0	0	0	0	0	0	0	0	0	0
187	Pasir Ris Central	10	4	0	4	2	0	0	2	3	12	3	0
188	Pasir Ris Drive	105	40	11	4	5	0	4	0	4	0	0	0
189	Pasir Ris Park	0	1	1	0	0	0	0	0	0	0	0	0
190	Pasir Ris Wafer Fab Park	0	0	0	0	0	0	0	0	0	0	0	0
191	Pasir Ris West	2	2	29	49	20	0	0	0	3	0	0	0
192	Paterson	0	0	0	0	0	0	0	0	0	0	0	0
193	Paya Lebar East	0	0	0	0	0	0	0	0	0	0	0	0
194	Paya Lebar North	0	0	3	0	0	0	0	0	0	0	0	0
195	Paya Lebar West	0	0	3	0	0	0	0	0	0	0	0	0
196	Pearl'S Hill	0	0	0	0	0	0	0	0	1	0	0	0
197	Pei Chun	0	5	0	0	0	0	1	0	5	0	0	0
198	Peng Siang	2	1	8	0	0	2	0	0	0	0	0	0
199	Penjuru Crescent	0	0	0	0	0	0	0	0	0	0	0	0
200	People'S Park	0	0	0	0	1	0	0	0	0	0	0	0
201	Phillip	0	0	0	0	0	0	0	0	0	0	0	0
202	Pioneer Sector	0	0	0	0	0	0	0	0	0	0	0	0
203	Plab	0	0	0	0	0	0	0	0	0	0	0	0
204	Port	0	0	0	3	0	0	0	0	0	0	0	0
205	Potong Pasir	0	0	4	0	0	0	0	2	1	0	0	0
206	Pulau Punggol Barat	0	0	0	0	0	0	1	2	2	0	0	0
207	Pulau Punggol Timor	0	0	0	0	0	0	0	0	0	0	0	0
208	Pulau Seletar	0	0	0	0	0	0	0	0	0	0	0	0
209	Punggol Canal	0	0	0	0	0	0	0	0	0	0	0	0
210	Punggol Field	2	2	2	4	0	0	0	0	0	2	0	0
211	Punggol Town Centre	0	0	0	0	0	0	0	0	1	0	0	0
212	Queensway	0	0	0	0	0	0	0	0	0	0	0	0
213	Raffles Place	0	0	0	0	0	0	0	0	0	0	0	0
214	Redhill	2	0	0	0	0	0	0	0	0	0	0	0
215	Reservoir View	0	0	0	0	0	0	0	0	0	0	0	0
216	Ridout	0	0	0	0	0	0	0	0	0	0	0	0
217	Rivervale	10	2	2	0	2	0	4	0	0	2	0	0
218	Robertson Quay	0	0	0	0	0	0	0	0	0	0	0	0
219	Rochor Canal	0	0	0	0	0	0	0	0	0	0	0	0
220	Safti	0	0	0	0	0	0	0	0	0	0	0	0
221	Samulun	0	0	0	0	0	0	0	0	0	0	0	0
222	Saujana	8	1	1	0	0	0	0	0	0	0	0	0
223	Selegie	0	0	0	0	0	0	0	0	0	0	0	0
224	Seletar	0	0	0	0	0	0	0	0	0	0	0	0
225	Seletar Aerospace Park	0	0	0	0	0	0	0	0	0	0	0	0
226	Seletar Hills	0	4	7	1	0	8	55	27	6	0	0	0
227	Semakau	0	0	0	0	0	0	0	0	0	0	0	0
228	Sembawang Central	6	3	0	3	31	31	19	13	0	2	0	0
229	Sembawang East	0	0	0	0	0	0	0	0	0	0	0	0
230	Sembawang Hills	11	13	17	0	9	12	1	0	0	0	0	0
231	Sembawang North	0	4	6	0	14	76	81	46	2	0	0	0
232	Sembawang Springs	13	41	15	0	0	0	0	0	0	0	0	0
233	Sembawang Straits	0	2	0	0	0	0	0	0	0	0	0	0
234	Sengkang Town Centre	1	5	6	6	6	2	2	0	0	0	2	0
235	Sengkang West	0	0	0	0	0	0	0	0	0	0	0	0
236	Senja	4	8	0	0	0	0	0	0	0	0	0	0
237	Sennett	4	0	1	3	0	0	0	0	1	0	0	0
238	Senoko North	0	0	0	0	0	0	0	0	0	0	0	0
239	Senoko South	0	0	0	1	5	2	0	0	0	1	0	0
240	Senoko West	10	0	0	1	0	0	0	0	0	0	0	0
241	Sentosa	0	0	0	0	0	0	0	0	0	0	0	0
242	Serangoon Central	48	37	29	2	2	1	0	2	4	0	0	3
243	Serangoon Garden	97	170	202	54	31	10	6	10	11	9	2	0
244	Serangoon North	3	14	9	4	0	0	0	9	5	0	0	0
245	Serangoon North Ind Estate	0	0	0	0	0	0	0	0	0	0	0	0
246	Shangri-La	2	2	2	0	0	3	0	0	0	0	0	0
247	Shipyard	0	0	0	0	0	0	0	0	0	0	0	0
248	Siglap	3	3	0	0	0	0	0	0	0	0	0	0
249	Simei	8	22	4	5	4	1	1	3	0	2	4	1
250	Simpang North	0	0	0	0	0	0	0	0	0	0	0	0
251	Simpang South	0	0	0	0	0	0	0	0	0	0	0	0
252	Singapore General Hospital	0	0	0	0	0	0	0	0	0	0	0	0
253	Singapore Polytechnic	0	0	0	0	0	0	0	0	0	0	0	0
254	Somerset	0	0	0	0	0	0	0	0	0	0	0	0
255	Southern Group	0	0	0	0	0	0	0	0	0	0	0	0
256	Springleaf	0	0	0	0	0	0	0	0	0	0	0	0
257	Straits View	0	0	0	0	0	0	0	0	0	0	0	0
258	Sudong	0	0	0	0	0	0	0	0	0	0	0	0
259	Sungei Road	2	4	0	0	0	0	0	0	0	0	0	0
260	Sunset Way	3	17	0	0	2	0	0	0	0	0	0	0
261	Swiss Club	0	0	0	0	0	0	0	2	0	0	0	0
262	Tagore	0	0	0	0	0	0	0	1	0	0	0	1
263	Tai Seng	4	15	9	1	0	7	10	2	3	0	0	0
264	Taman Jurong	13	7	14	0	0	0	0	12	29	5	0	0
265	Tampines East	46	36	61	73	53	6	0	11	16	0	5	5
266	Tampines North	0	0	0	0	0	0	0	0	0	0	0	0
267	Tampines West	180	215	59	18	28	41	72	125	3	6	2	0
268	Tanglin	0	0	0	0	0	0	0	0	0	0	0	0
269	Tanglin Halt	0	2	10	0	0	0	0	0	0	0	0	0
270	Tanjong Irau	0	0	0	0	0	0	0	0	0	0	0	0
271	Tanjong Pagar	0	0	0	0	0	0	0	0	0	0	0	0
272	Tanjong Rhu	0	5	0	3	2	2	4	0	0	0	0	0
273	Teban Gardens	0	2	5	0	0	0	0	0	0	0	0	0
274	Teck Whye	2	6	4	3	0	0	0	2	10	0	0	0
275	Telok Blangah Drive	0	0	0	0	0	0	0	0	0	0	0	0
276	Telok Blangah Rise	2	5	0	3	0	0	0	2	0	0	2	0
277	Telok Blangah Way	0	0	0	0	0	0	0	2	0	0	0	0
278	Tengah	0	0	0	0	0	0	0	0	0	0	0	0
279	Tengeh	0	0	0	0	0	0	0	0	0	0	0	0
280	The Wharves	0	0	0	0	0	0	0	0	0	0	0	0
281	Tiong Bahru	0	0	1	0	0	0	0	0	0	0	0	0
282	Tiong Bahru Station	0	0	0	0	0	0	0	0	4	0	0	0
283	Toa Payoh Central	8	6	1	13	5	0	1	0	1	0	0	0
284	Toa Payoh West	11	10	7	3	1	0	0	0	0	0	0	0
285	Toh Guan	0	0	0	0	0	0	0	0	0	0	0	0
286	Toh Tuck	0	0	0	0	0	0	0	1	0	0	0	0
287	Townsville	4	9	19	3	0	0	0	0	0	0	0	0
288	Trafalgar	20	3	11	16	15	4	0	0	0	0	0	0
289	Tuas Bay	0	0	0	0	0	0	0	0	0	0	0	0
290	Tuas North	0	0	0	0	0	0	0	0	0	0	0	0
291	Tuas Promenade	0	0	0	0	0	0	0	0	0	0	0	0
292	Tuas View	0	0	0	0	0	0	0	0	0	0	0	0
293	Tuas View Extension	0	0	0	1	0	0	0	0	0	0	0	0
294	Tukang	0	0	0	0	0	0	0	0	0	0	0	0
295	Turf Club	0	0	0	0	0	0	0	0	0	0	0	0
296	Tyersall	0	0	0	0	0	0	2	0	0	0	0	0
297	Ulu Pandan	1	3	0	0	0	0	0	0	1	0	0	0
298	Upper Paya Lebar	64	33	12	2	0	0	4	2	0	4	0	0
299	Upper Thomson	59	27	13	4	5	15	11	7	0	0	0	0
300	Victoria	2	2	0	0	0	0	0	0	0	0	0	0
301	Waterway East	1	4	2	0	0	0	2	0	0	0	0	0
302	Wenya	0	4	4	0	0	0	0	0	0	0	0	2
303	West Coast	0	0	0	1	0	0	0	0	0	0	0	0
304	Western Water Catchment	0	0	0	0	0	1	0	0	0	0	0	0
305	Woodgrove	6	16	25	0	0	2	7	0	0	0	2	0
306	Woodlands East	37	22	17	0	8	21	2	4	2	2	0	6
307	Woodlands Regional Centre	0	0	2	0	0	2	0	0	0	0	0	0
308	Woodlands South	5	9	5	0	0	0	2	0	4	2	1	0
309	Woodlands West	23	61	35	6	0	3	0	0	2	0	0	0
310	Woodleigh	0	2	0	0	0	0	0	0	1	0	0	0
311	Xilin	0	0	1	1	2	0	0	0	0	0	0	0
312	Yew Tee	5	0	11	0	2	0	2	0	0	0	0	0
313	Yio Chu Kang	0	0	0	0	0	0	0	0	0	0	0	0
314	Yio Chu Kang East	0	3	0	2	0	0	0	0	0	0	0	0
315	Yio Chu Kang North	0	0	0	0	0	0	0	0	0	0	0	0
316	Yio Chu Kang West	3	3	8	2	0	0	0	0	0	0	0	0
317	Yishun Central	0	0	0	0	0	0	0	0	0	0	0	0
318	Yishun East	2	7	28	17	7	0	0	10	2	0	0	5
319	Yishun South	84	132	9	1	1	3	8	50	74	124	57	0
320	Yishun West	18	36	73	65	30	4	2	0	0	0	0	0
321	Yuhua East	6	11	24	2	0	5	0	0	0	0	1	0
322	Yuhua West	4	0	2	0	0	0	0	0	0	0	0	0
323	Yunnan	22	65	87	9	2	0	0	2	2	0	0	0
		2121	2552	2052	1038	762	599	737	976	672	414	147	111	12181	Total
														1015.08	monthly avg.

## Sheet: 2017
S.No	SUBZONE_Name	Jan	Feb	March	April	May	June	July	Aug	Sep	Oct	Nov	Dec
1	Admiralty	0	0	0	0	0	0	0	0	0	0	0	0
2	Airport Road	0	0	0	0	0	0	0	0	0	0	0	0
3	Alexandra Hill	0	0	0	0	0	0	0	0	0	0	0	0
4	Alexandra North	0	0	0	0	0	0	0	0	0	0	0	0
5	Aljunied	1	4	0	0	0	2	2	0	0	2	2	0
6	Anak Bukit	0	0	0	0	0	0	0	0	0	0	0	0
7	Anchorvale	0	0	0	0	0	0	0	0	0	0	0	2
8	Ang Mo Kio Town Centre	0	0	0	0	0	0	0	0	0	0	0	0
9	Anson	0	0	0	0	0	0	0	0	0	0	0	0
10	Balestier	0	4	6	0	0	0	0	0	0	2	0	0
11	Bangkit	14	0	0	0	0	0	0	0	0	0	0	0
12	Bayfront Subzone	0	0	0	0	0	0	0	0	0	0	0	0
13	Bayshore	0	0	0	0	0	5	27	4	1	0	0	0
14	Bedok North	0	0	0	17	1	0	0	2	1	0	0	0
15	Bedok Reservoir	0	0	0	0	0	0	0	0	0	20	32	26
16	Bedok South	0	0	0	0	0	0	0	0	0	3	0	0
17	Bencoolen	0	0	0	0	0	0	0	0	0	0	0	0
18	Bendemeer	0	2	0	0	0	0	0	0	0	0	0	0
19	Benoi Sector	0	0	0	0	0	0	0	0	0	0	0	0
20	Bidadari	0	0	0	0	0	0	0	0	0	0	0	0
21	Bishan East	0	0	0	0	0	0	0	0	0	0	0	0
22	Boat Quay	0	0	0	0	0	0	0	0	0	0	0	0
23	Boon Keng	0	0	0	0	0	0	0	0	0	0	0	0
24	Boon Lay Place	0	0	0	0	0	0	0	0	0	0	0	0
25	Boon Teck	0	0	0	0	2	1	0	0	0	0	0	0
26	Boulevard	0	0	0	0	0	0	0	0	0	0	0	0
27	Braddell	0	0	0	0	0	0	0	0	0	0	0	0
28	Bras Basah	0	0	0	0	0	0	0	0	0	0	0	0
29	Brickworks	0	0	0	0	0	0	0	0	0	0	0	0
30	Bugis	0	0	0	0	0	0	0	0	0	0	0	0
31	Bukit Batok Central	0	3	0	0	2	0	0	0	0	0	0	0
32	Bukit Batok East	0	2	0	0	0	0	2	0	0	0	3	0
33	Bukit Batok South	0	0	0	0	0	0	0	0	0	0	0	0
34	Bukit Batok West	0	0	0	0	0	0	0	0	0	0	0	0
35	Bukit Ho Swee	0	0	0	0	0	0	2	0	0	0	0	0
36	Bukit Merah	0	0	0	0	0	0	0	0	0	0	0	0
37	Cairnhill	0	0	0	0	0	0	0	0	0	0	0	0
38	Cecil	0	0	0	0	0	0	0	0	0	0	0	0
39	Central Subzone	0	0	0	0	0	0	0	0	0	0	0	0
40	Central Water Catchment	0	0	0	0	0	0	0	0	0	0	0	0
41	Changi Airport	0	0	0	0	0	0	0	0	0	0	0	0
42	Changi Bay	0	0	0	0	0	0	0	0	0	0	0	0
43	Changi Point	0	0	0	0	0	0	0	0	0	0	0	0
44	Changi West	0	0	0	0	0	0	0	0	0	0	0	0
45	Chatsworth	0	0	0	0	0	0	0	0	0	0	0	0
46	Cheng San	2	0	0	4	8	0	1	2	0	0	0	0
47	Chin Bee	0	0	0	0	0	0	0	0	0	0	0	0
48	China Square	0	0	0	0	0	0	0	0	0	0	0	0
49	Chinatown	6	0	0	0	0	0	0	2	0	0	0	0
50	Choa Chu Kang Central	0	0	0	0	0	0	1	0	0	0	0	0
51	Choa Chu Kang North	0	0	0	0	4	6	4	0	0	2	0	0
52	Chong Boon	24	0	0	0	0	0	0	0	0	0	0	0
53	City Hall	0	0	0	0	0	0	0	0	0	0	0	0
54	City Terminals	0	0	0	0	0	0	0	0	0	0	0	0
55	Clarke Quay	0	0	0	0	0	0	0	0	0	0	0	0
56	Clementi Central	0	0	0	0	0	0	0	0	0	0	0	0
57	Clementi North	0	0	0	0	0	0	0	0	0	0	0	0
58	Clementi West	0	0	0	0	0	0	0	0	0	0	0	0
59	Clementi Woods	0	0	0	0	0	0	0	0	0	0	0	0
60	Clifford Pier	0	0	0	0	0	0	0	0	0	0	0	0
61	Commonwealth	0	0	0	0	0	0	0	0	0	0	0	0
62	Compassvale	0	0	0	0	0	0	0	0	0	0	0	0
63	Coney Island	0	0	0	0	0	0	0	0	0	0	0	0
64	Coronation Road	0	0	0	0	0	0	0	0	0	0	0	0
65	Crawford	2	5	0	0	0	0	0	0	0	6	1	5
66	Dairy Farm	4	0	0	0	0	0	0	0	0	0	0	0
67	Defu Industrial Park	0	0	0	0	0	0	0	0	0	0	0	0
68	Depot Road	0	0	0	0	0	0	0	0	0	0	0	0
69	Dhoby Ghaut	0	0	0	0	0	0	0	0	0	0	0	0
70	Dover	0	0	0	0	0	0	0	0	0	0	0	0
71	Dunearn	0	0	0	0	0	0	0	0	0	0	0	0
72	East Coast	0	0	0	0	0	0	0	0	0	0	0	0
73	Everton Park	2	0	0	0	0	0	0	0	0	0	0	0
74	Faber	0	0	0	0	0	0	0	0	0	0	0	0
75	Fajar	0	0	0	0	0	0	0	0	0	0	0	0
76	Farrer Court	0	0	0	0	0	0	0	0	0	0	0	0
77	Farrer Park	0	0	0	0	0	0	0	0	0	0	0	0
78	Fernvale	0	0	0	0	0	0	0	0	0	0	0	0
79	Flora Drive	0	0	0	0	0	0	0	0	0	0	0	0
80	Fort Canning	0	0	0	0	0	0	0	0	0	0	0	0
81	Frankel	0	0	0	0	0	0	0	0	0	0	0	0
82	Gali Batu	0	0	0	0	0	0	0	0	0	0	0	0
83	Geylang Bahru	0	2	6	0	0	0	0	0	0	0	0	0
84	Geylang East	0	0	0	0	0	0	0	1	0	0	0	0
85	Ghim Moh	0	0	0	0	0	0	0	0	0	0	0	0
86	Gombak	0	0	0	0	0	0	0	0	0	0	0	0
87	Goodwood Park	0	0	0	0	0	0	0	0	0	0	0	0
88	Greenwood Park	0	0	0	0	0	0	0	0	0	0	0	0
89	Guilin	0	0	0	0	0	0	0	0	0	0	0	0
90	Gul Basin	0	0	0	0	0	0	0	0	0	0	0	0
91	Gul Circle	0	0	0	0	0	0	0	0	0	0	0	0
92	Henderson Hill	0	0	0	0	0	0	2	0	0	0	0	0
93	Hillcrest	0	0	0	0	0	0	0	0	0	0	0	0
94	Hillview	0	0	0	0	0	0	0	0	4	0	0	0
95	Holland Drive	0	0	0	0	0	0	0	0	0	0	1	0
96	Holland Road	0	0	0	0	0	0	0	0	0	0	0	0
97	Hong Kah	0	0	0	0	0	2	3	0	0	0	0	0
98	Hong Kah North	4	0	0	0	0	0	0	0	0	0	0	0
99	Hougang Central	0	0	0	0	0	0	0	0	0	0	0	0
100	Hougang East	17	3	0	0	0	0	0	0	0	0	0	0
101	Hougang West	4	0	0	0	0	10	12	34	10	0	0	0
102	Institution Hill	0	0	0	0	0	0	0	0	0	0	0	0
103	International Business Park	0	0	0	0	0	0	0	0	0	0	0	0
104	Istana Negara	0	0	0	0	0	0	0	0	0	0	0	0
105	Jelebu	0	0	0	0	0	0	0	0	0	0	0	0
106	Joo Koon	0	0	0	0	0	0	0	0	0	0	0	0
107	Joo Seng	1	0	0	0	0	1	1	0	0	0	0	0
108	Jurong Gateway	0	0	0	0	0	0	0	0	0	0	0	0
109	Jurong Island And Bukom	0	0	0	0	0	0	0	0	0	0	0	0
110	Jurong Port	0	0	0	0	0	0	0	0	0	0	0	0
111	Jurong River	0	0	0	0	0	0	0	0	0	0	0	0
112	Jurong West Central	0	0	0	0	0	0	0	0	0	0	0	0
113	Kaki Bukit	0	6	0	0	0	0	4	0	0	2	0	0
114	Kallang Bahru	0	0	0	0	0	0	0	0	0	0	0	0
115	Kallang Way	0	0	0	0	0	0	0	0	0	0	0	0
116	Kampong Bugis	0	0	0	0	0	0	0	0	0	0	0	0
117	Kampong Glam	0	0	0	0	0	0	0	0	0	0	0	0
118	Kampong Java	3	0	0	0	0	0	0	0	0	0	0	0
119	Kampong Tiong Bahru	0	0	0	0	0	0	0	0	0	0	0	0
120	Kampong Ubi	0	0	0	0	0	0	0	0	0	0	2	0
121	Kangkar	0	0	0	0	0	0	0	0	4	0	0	3
122	Katong	0	0	0	0	0	0	2	0	2	0	0	0
123	Keat Hong	0	0	0	0	0	0	0	0	0	0	0	3
124	Kebun Bahru	0	0	0	0	0	0	0	0	0	0	0	0
125	Kembangan	0	0	0	0	7	3	0	0	2	0	1	3
126	Kent Ridge	0	0	0	0	0	0	0	0	0	0	0	0
127	Khatib	0	0	0	0	0	0	0	0	0	0	0	0
128	Kian Teck	0	0	0	0	0	0	1	0	0	0	0	0
129	Kim Keat	0	0	0	0	0	0	0	0	0	0	0	0
130	Kovan	7	0	0	0	0	0	4	0	0	0	0	1
131	Kranji	0	0	0	0	0	0	0	0	0	0	0	0
132	Lakeside	0	0	0	0	0	1	1	0	0	0	0	0
133	Lavender	0	0	0	0	0	0	0	0	0	5	3	0
134	Leedon Park	0	0	0	0	0	0	0	0	0	0	1	0
135	Leonie Hill	0	0	0	0	0	0	0	0	0	0	0	0
136	Lim Chu Kang	0	0	0	0	0	0	0	0	0	0	0	0
137	Little India	0	0	0	0	0	2	0	0	0	0	0	0
138	Liu Fang	0	0	0	0	0	0	0	0	0	0	0	0
139	Lorong 8 Toa Payoh	0	0	0	0	0	0	0	0	0	0	0	0
140	Lorong Ah Soo	0	0	0	0	0	0	0	0	1	1	0	0
141	Lorong Chuan	0	0	0	0	0	0	0	0	0	0	0	0
142	Lorong Halus	0	0	0	0	0	0	0	0	0	0	0	0
143	Lorong Halus North	0	0	0	0	0	0	0	0	0	0	0	0
144	Lower Seletar	0	2	0	0	0	0	0	0	0	0	0	0
145	Loyang East	0	0	0	0	0	0	0	0	0	0	0	0
146	Loyang West	0	0	0	0	0	0	0	0	0	0	0	0
147	Mackenzie	0	0	0	0	0	0	0	0	0	0	0	0
148	Macpherson	0	0	0	2	0	0	0	0	0	0	2	2
149	Malcolm	0	0	0	0	0	0	0	0	0	0	0	0
150	Mandai East	0	0	0	0	0	0	0	0	0	0	0	0
151	Mandai Estate	0	0	0	0	0	0	0	0	0	0	0	0
152	Mandai West	0	0	0	0	0	0	0	0	0	0	0	0
153	Margaret Drive	0	0	0	0	0	0	0	0	0	0	0	0
154	Marina Centre	0	0	0	0	0	0	0	0	0	0	0	0
155	Marina East	0	0	0	0	0	0	0	0	0	0	0	0
156	Marina East (Mp)	0	0	0	0	0	0	0	0	0	0	0	0
157	Marina South	0	0	0	0	0	0	0	0	0	0	0	0
158	Marine Parade	0	0	0	1	0	0	0	0	0	0	0	0
159	Maritime Square	0	0	0	0	0	0	0	0	0	0	0	0
160	Marymount	0	0	0	0	0	0	0	0	0	0	0	0
161	Matilda	0	0	0	0	0	0	0	0	0	0	0	0
162	Maxwell	0	0	0	0	0	0	0	0	0	0	0	0
163	Mei Chin	0	0	0	1	0	0	0	0	0	0	0	0
164	Midview	0	0	0	0	2	0	2	0	0	0	0	0
165	Monk'S Hill	0	0	0	0	0	0	0	0	0	0	0	0
166	Moulmein	4	2	0	0	0	0	0	0	0	0	0	0
167	Mount Emily	1	0	0	0	0	0	0	0	0	0	0	0
168	Mount Pleasant	0	0	0	0	0	0	0	0	0	0	0	0
169	Mountbatten	0	0	0	0	0	0	0	0	0	0	0	0
170	Nassim	0	0	0	0	1	0	0	0	0	0	0	0
171	National University Of S'Pore	0	0	0	0	0	0	0	0	0	0	0	0
172	Nature Reserve	0	0	0	0	0	0	0	0	0	0	0	0
173	Nee Soon	0	0	0	0	0	0	0	0	0	0	0	0
174	Newton Circus	0	0	0	0	0	0	0	0	0	0	0	0
175	North Coast	0	0	0	0	2	0	0	0	0	0	0	0
176	North-Eastern Islands	0	0	0	0	0	0	0	0	0	0	0	0
177	Northland	0	0	1	0	0	0	0	0	0	0	0	0
178	Northshore	0	0	0	0	0	0	0	0	0	0	0	0
179	One North	0	0	0	0	0	0	0	0	0	0	0	0
180	One Tree Hill	0	0	0	0	0	0	0	0	0	0	0	0
181	Orange Grove	0	0	0	0	0	0	0	0	0	0	0	0
182	Oxley	0	0	0	0	0	0	0	0	0	0	0	0
183	Pandan	0	0	0	0	0	0	0	0	0	0	0	0
184	Pang Sua	0	1	0	0	0	0	0	0	0	0	0	0
185	Pasir Panjang 1	0	0	0	0	0	1	2	0	0	0	0	0
186	Pasir Panjang 2	0	0	0	0	0	0	0	0	0	0	0	0
187	Pasir Ris Central	0	0	0	0	0	0	3	0	0	0	2	0
188	Pasir Ris Drive	0	0	0	0	0	0	0	0	3	3	0	0
189	Pasir Ris Park	0	0	0	0	0	0	0	0	0	0	0	0
190	Pasir Ris Wafer Fab Park	0	0	0	0	0	0	0	0	0	0	0	0
191	Pasir Ris West	0	0	2	0	0	0	0	2	0	0	0	0
192	Paterson	0	0	0	0	0	0	0	0	0	0	0	0
193	Paya Lebar East	0	0	0	0	0	0	0	0	0	0	0	0
194	Paya Lebar North	0	0	0	0	0	0	0	0	0	0	0	0
195	Paya Lebar West	0	0	0	0	0	0	0	0	0	0	0	0
196	Pearl'S Hill	0	0	0	0	0	0	0	0	0	0	0	0
197	Pei Chun	0	0	0	0	0	0	0	0	0	0	0	0
198	Peng Siang	0	0	0	0	0	0	0	0	0	0	0	2
199	Penjuru Crescent	0	0	0	0	0	0	0	0	0	0	0	0
200	People'S Park	0	0	0	0	0	0	0	0	0	0	0	0
201	Phillip	0	0	0	0	0	0	0	0	0	0	0	0
202	Pioneer Sector	0	0	0	0	0	0	0	0	0	0	0	0
203	Plab	0	0	0	0	0	0	0	0	0	0	0	0
204	Port	0	0	0	0	0	0	0	0	0	0	0	0
205	Potong Pasir	0	0	0	0	0	0	2	0	0	0	0	0
206	Pulau Punggol Barat	0	0	0	0	0	0	0	0	0	0	0	0
207	Pulau Punggol Timor	0	0	0	0	0	0	0	0	0	0	0	0
208	Pulau Seletar	0	0	0	0	0	0	0	0	0	0	0	0
209	Punggol Canal	0	0	0	0	0	0	0	0	0	0	0	0
210	Punggol Field	0	0	0	0	0	0	2	0	0	0	0	0
211	Punggol Town Centre	0	0	0	0	0	0	0	0	0	0	0	0
212	Queensway	0	0	0	0	0	0	0	0	0	0	0	0
213	Raffles Place	0	0	0	0	0	0	0	0	0	0	0	0
214	Redhill	0	2	0	0	0	0	0	0	0	0	0	0
215	Reservoir View	0	0	0	0	0	0	0	0	0	0	0	0
216	Ridout	0	0	0	0	0	0	0	0	0	0	0	0
217	Rivervale	0	0	0	0	0	0	0	0	4	0	0	3
218	Robertson Quay	0	0	0	0	0	0	0	0	0	0	0	0
219	Rochor Canal	0	0	0	0	0	0	0	0	0	0	0	0
220	Safti	0	0	0	0	0	0	0	0	0	0	0	0
221	Samulun	0	0	0	0	0	0	0	0	0	0	0	0
222	Saujana	2	0	0	0	0	0	0	0	0	0	0	0
223	Selegie	0	0	0	0	0	0	0	0	0	0	0	0
224	Seletar	0	0	0	0	0	0	0	0	0	0	0	0
225	Seletar Aerospace Park	0	0	0	0	0	0	0	0	0	0	0	0
226	Seletar Hills	0	0	0	0	0	0	0	0	0	0	0	0
227	Semakau	0	0	0	0	0	0	0	0	0	0	0	0
228	Sembawang Central	0	0	0	0	0	0	0	4	0	0	0	0
229	Sembawang East	0	0	0	0	0	0	0	0	0	0	0	0
230	Sembawang Hills	0	0	0	0	0	0	0	0	0	0	0	0
231	Sembawang North	0	0	0	0	0	0	0	0	0	0	0	0
232	Sembawang Springs	0	0	0	0	0	0	0	0	0	0	0	0
233	Sembawang Straits	0	0	0	0	0	0	0	0	0	0	0	0
234	Sengkang Town Centre	2	0	0	0	0	0	0	0	0	0	0	0
235	Sengkang West	0	0	0	0	0	0	0	0	0	0	0	0
236	Senja	2	0	0	0	0	0	0	0	0	0	0	0
237	Sennett	0	0	0	0	0	0	0	0	4	0	0	0
238	Senoko North	0	0	0	0	0	0	0	0	0	0	0	0
239	Senoko South	0	0	0	0	0	0	0	0	0	0	0	0
240	Senoko West	0	1	0	0	0	0	0	0	0	0	0	0
241	Sentosa	0	0	0	0	0	0	0	0	0	0	0	0
242	Serangoon Central	2	0	0	0	0	0	1	0	4	0	0	0
243	Serangoon Garden	2	0	0	0	0	2	4	35	18	6	0	0
244	Serangoon North	0	0	0	0	0	0	0	0	0	0	0	0
245	Serangoon North Ind Estate	0	0	0	0	0	0	0	0	0	0	0	0
246	Shangri-La	1	0	0	0	0	0	0	0	0	0	0	0
247	Shipyard	0	0	0	0	0	0	0	0	0	0	0	0
248	Siglap	0	0	0	0	0	0	0	0	0	0	0	0
249	Simei	2	2	0	0	0	0	2	0	1	3	0	0
250	Simpang North	0	0	0	0	0	0	0	0	0	0	0	0
251	Simpang South	0	0	0	0	0	0	0	0	0	0	0	0
252	Singapore General Hospital	0	0	0	0	0	0	0	0	0	0	0	0
253	Singapore Polytechnic	0	0	0	0	0	0	0	0	0	0	0	0
254	Somerset	0	0	0	0	0	0	0	0	0	0	0	0
255	Southern Group	0	0	0	0	0	0	0	0	0	0	0	0
256	Springleaf	0	0	0	0	0	0	0	0	0	0	0	0
257	Straits View	0	0	0	0	0	0	0	0	0	0	0	0
258	Sudong	0	0	0	0	0	0	0	0	0	0	0	0
259	Sungei Road	0	0	0	0	0	0	0	0	0	0	0	0
260	Sunset Way	0	0	0	0	0	0	0	0	0	0	0	0
261	Swiss Club	0	0	0	0	0	0	0	0	0	0	0	0
262	Tagore	0	0	0	0	0	0	0	0	0	0	1	0
263	Tai Seng	0	0	0	0	0	0	0	0	4	2	0	0
264	Taman Jurong	0	0	0	0	2	19	7	0	4	3	0	0
265	Tampines East	32	38	10	2	0	4	0	0	0	0	3	6
266	Tampines North	0	0	0	0	0	0	0	0	0	0	0	0
267	Tampines West	10	5	0	0	0	2	0	0	0	0	3	0
268	Tanglin	0	0	0	0	0	0	0	0	0	0	0	0
269	Tanglin Halt	0	0	0	0	0	0	0	0	0	0	0	0
270	Tanjong Irau	0	0	0	0	0	0	0	0	0	0	0	0
271	Tanjong Pagar	0	0	0	0	0	1	0	0	0	0	0	0
272	Tanjong Rhu	0	0	0	0	0	0	0	0	0	0	0	0
273	Teban Gardens	0	0	0	0	4	15	0	0	0	0	0	0
274	Teck Whye	2	0	0	0	0	0	1	0	0	0	0	0
275	Telok Blangah Drive	0	0	0	0	0	0	0	0	0	0	0	0
276	Telok Blangah Rise	0	0	0	0	0	0	0	0	0	0	0	0
277	Telok Blangah Way	0	0	0	0	0	0	0	0	0	0	0	0
278	Tengah	0	0	0	0	0	0	0	0	0	0	0	0
279	Tengeh	0	0	0	0	0	0	0	0	0	0	0	0
280	The Wharves	0	0	0	0	0	0	0	0	0	0	0	0
281	Tiong Bahru	0	0	0	0	0	0	0	0	0	0	0	0
282	Tiong Bahru Station	0	0	0	0	0	0	0	0	0	0	0	0
283	Toa Payoh Central	0	0	0	0	2	4	0	0	0	0	0	2
284	Toa Payoh West	2	2	0	0	0	0	0	0	0	0	0	0
285	Toh Guan	0	0	0	0	0	0	0	0	0	0	0	0
286	Toh Tuck	0	0	0	0	0	0	0	0	0	0	0	0
287	Townsville	1	0	0	0	0	0	0	0	0	0	0	0
288	Trafalgar	0	0	0	0	0	0	0	0	0	0	0	0
289	Tuas Bay	0	0	0	0	0	0	0	0	0	0	0	0
290	Tuas North	0	0	0	0	0	0	0	0	0	0	0	0
291	Tuas Promenade	0	0	0	0	0	0	0	0	0	0	0	0
292	Tuas View	0	0	0	0	0	0	0	0	0	0	0	0
293	Tuas View Extension	0	0	0	0	0	0	0	0	0	0	0	0
294	Tukang	0	0	0	0	0	0	0	0	0	0	0	0
295	Turf Club	0	0	0	0	0	0	0	0	0	0	0	0
296	Tyersall	0	0	0	0	0	0	0	0	0	0	0	0
297	Ulu Pandan	0	0	0	0	0	0	0	0	0	0	0	0
298	Upper Paya Lebar	0	1	0	0	0	2	2	0	0	0	0	0
299	Upper Thomson	0	0	0	0	0	0	0	0	0	0	0	0
300	Victoria	0	0	0	0	0	0	0	0	0	0	0	0
301	Waterway East	0	0	0	0	0	0	0	0	0	0	0	0
302	Wenya	0	0	0	0	0	0	0	0	0	0	0	0
303	West Coast	0	0	0	0	0	0	0	0	0	0	0	0
304	Western Water Catchment	1	3	0	0	0	0	0	0	0	1	0	0
305	Woodgrove	0	0	0	9	1	6	9	4	2	0	0	0
306	Woodlands East	0	0	0	0	0	0	0	0	2	0	0	0
307	Woodlands Regional Centre	0	0	0	0	0	0	0	0	0	0	0	0
308	Woodlands South	2	0	0	0	2	0	2	0	0	0	6	0
309	Woodlands West	0	0	0	0	0	0	0	0	0	0	0	0
310	Woodleigh	0	0	0	0	0	0	0	0	0	0	0	0
311	Xilin	0	0	0	0	0	0	0	0	0	0	0	0
312	Yew Tee	0	2	0	0	0	0	0	0	0	2	0	0
313	Yio Chu Kang	0	0	0	0	0	0	0	0	0	0	0	0
314	Yio Chu Kang East	0	0	0	0	0	0	0	0	0	0	0	0
315	Yio Chu Kang North	0	0	0	0	0	0	0	0	0	0	0	0
316	Yio Chu Kang West	0	0	0	0	0	0	0	0	0	0	0	0
317	Yishun Central	0	0	0	0	0	0	0	0	0	0	0	0
318	Yishun East	0	0	0	0	0	0	0	0	0	0	0	0
319	Yishun South	0	0	0	0	0	0	0	0	0	0	0	0
320	Yishun West	0	2	0	4	2	2	0	0	0	2	0	0
321	Yuhua East	8	0	0	0	0	0	0	0	0	2	0	0
322	Yuhua West	0	0	0	0	0	0	1	0	0	0	0	0
323	Yunnan	0	2	0	0	0	0	0	0	0	0	0	0
		167	96	25	40	42	91	109	90	71	67	63	58	919
														76.5833	monthly avg.

## Sheet: 2018
S.No	SUBZONE_Name	Jan	Feb	March	April	May	June	July	Aug	Sep	Oct	Nov	Dec
1	Admiralty	0	0	0	0	0	0	0	0	0	0	0	0
2	Airport Road	0	0	0	0	0	0	0	0	0	0	0	0
3	Alexandra Hill	0	0	0	0	0	0	0	0	0	0	0	0
4	Alexandra North	0	0	0	0	0	0	0	0	0	0	0	0
5	Aljunied	4	6	2	3	0	2	11	2	0	0	0	0
6	Anak Bukit	0	0	0	0	2	2	0	2	2	6	30	36
7	Anchorvale	2	0	0	0	0	0	0	0	0	0	0	0
8	Ang Mo Kio Town Centre	0	0	0	0	0	0	0	0	0	0	0	0
9	Anson	0	0	0	0	0	0	0	0	0	0	0	0
10	Balestier	5	0	0	17	4	23	4	6	0	0	0	0
11	Bangkit	3	0	0	0	0	0	0	0	0	0	0	0
12	Bayfront Subzone	0	0	0	0	0	0	0	0	0	0	0	0
13	Bayshore	0	0	0	0	0	0	0	0	0	1	0	0
14	Bedok North	0	0	0	18	37	26	0	0	0	0	0	0
15	Bedok Reservoir	0	0	0	0	0	2	0	0	0	0	0	0
16	Bedok South	0	0	0	0	0	0	2	0	0	0	6	46
17	Bencoolen	0	0	0	0	0	0	0	0	0	0	0	0
18	Bendemeer	2	0	0	0	0	3	0	0	0	0	0	0
19	Benoi Sector	0	0	0	0	0	0	0	0	0	0	0	0
20	Bidadari	0	0	0	0	0	0	0	0	0	0	0	0
21	Bishan East	0	0	0	0	0	2	0	0	7	2	10	0
22	Boat Quay	0	0	0	0	0	0	0	0	0	0	0	0
23	Boon Keng	0	0	0	0	0	0	0	0	0	0	0	0
24	Boon Lay Place	0	0	0	0	0	4	0	0	0	0	0	0
25	Boon Teck	0	0	0	0	0	0	0	0	0	0	0	0
26	Boulevard	0	0	0	0	0	0	0	0	0	0	0	0
27	Braddell	0	0	0	0	0	0	0	0	0	0	0	0
28	Bras Basah	0	0	0	0	0	0	0	0	0	0	0	0
29	Brickworks	0	0	0	0	1	0	0	0	0	0	0	4
30	Bugis	0	0	0	0	0	0	0	0	0	0	0	0
31	Bukit Batok Central	1	0	0	0	0	0	0	0	4	7	0	0
32	Bukit Batok East	0	0	0	0	0	0	0	0	0	0	0	0
33	Bukit Batok South	0	0	0	0	0	0	0	0	0	0	0	0
34	Bukit Batok West	0	0	2	0	0	2	0	0	0	0	2	0
35	Bukit Ho Swee	0	0	0	0	0	0	0	0	0	0	0	0
36	Bukit Merah	0	0	0	0	0	0	0	0	0	0	0	0
37	Cairnhill	0	0	0	0	0	0	0	0	0	0	0	0
38	Cecil	0	0	0	0	0	0	0	0	0	0	0	0
39	Central Subzone	0	0	0	0	0	0	0	0	0	0	0	0
40	Central Water Catchment	0	0	0	0	0	0	0	0	0	0	0	0
41	Changi Airport	0	0	0	0	0	0	0	0	0	0	0	0
42	Changi Bay	0	0	0	0	0	0	0	0	0	0	0	0
43	Changi Point	0	0	0	0	0	0	0	0	0	0	0	0
44	Changi West	0	0	0	0	0	0	0	0	0	0	0	0
45	Chatsworth	0	0	0	0	2	0	0	0	0	0	0	0
46	Cheng San	0	0	0	0	0	0	0	0	0	0	0	0
47	Chin Bee	0	0	0	0	0	0	0	0	0	0	0	0
48	China Square	0	0	0	0	0	0	0	0	0	0	0	0
49	Chinatown	0	0	0	0	0	6	0	0	0	0	0	0
50	Choa Chu Kang Central	0	0	0	0	0	0	0	0	0	0	0	0
51	Choa Chu Kang North	0	0	0	0	0	2	3	0	0	0	0	4
52	Chong Boon	0	0	0	0	0	0	0	0	0	0	0	0
53	City Hall	0	0	0	0	0	0	0	0	0	0	0	0
54	City Terminals	0	0	0	0	0	0	0	0	0	0	0	0
55	Clarke Quay	0	0	0	0	0	0	0	0	0	0	0	0
56	Clementi Central	0	0	0	0	0	0	0	0	0	0	0	0
57	Clementi North	0	0	0	0	0	0	2	0	0	0	0	0
58	Clementi West	0	0	0	0	0	0	0	0	0	0	0	0
59	Clementi Woods	0	0	0	0	0	0	0	0	0	0	0	0
60	Clifford Pier	0	0	0	0	0	0	0	0	0	0	0	0
61	Commonwealth	0	0	0	0	0	0	0	0	0	0	0	0
62	Compassvale	0	0	0	0	0	0	0	0	0	0	0	0
63	Coney Island	0	0	0	0	0	0	0	0	0	0	0	0
64	Coronation Road	0	0	0	0	0	0	0	0	0	0	0	0
65	Crawford	0	0	0	0	0	0	2	0	0	0	0	0
66	Dairy Farm	0	5	6	7	5	0	0	0	0	0	0	1
67	Defu Industrial Park	0	0	0	0	0	0	0	0	0	0	0	0
68	Depot Road	0	0	0	0	0	0	0	0	0	0	0	0
69	Dhoby Ghaut	0	0	0	0	0	0	0	0	0	0	0	0
70	Dover	0	0	0	0	0	0	0	0	0	0	0	0
71	Dunearn	0	0	0	0	0	0	0	0	0	0	0	0
72	East Coast	0	0	0	0	0	0	0	0	0	0	0	0
73	Everton Park	0	0	0	0	0	0	0	0	0	0	0	0
74	Faber	0	0	0	0	0	0	0	0	0	0	0	0
75	Fajar	0	0	0	0	0	0	2	0	0	0	0	0
76	Farrer Court	0	0	0	0	0	0	0	0	0	0	0	0
77	Farrer Park	0	0	0	0	0	0	0	0	0	0	0	0
78	Fernvale	0	0	0	0	0	0	2	0	0	0	0	0
79	Flora Drive	0	0	0	0	0	0	0	0	0	0	0	0
80	Fort Canning	0	0	0	0	0	0	0	0	0	0	0	0
81	Frankel	0	0	0	4	1	2	6	7	2	2	1	1
82	Gali Batu	0	0	0	0	0	0	0	0	0	0	0	0
83	Geylang Bahru	0	0	0	0	0	0	0	0	0	0	0	0
84	Geylang East	0	0	2	6	4	0	1	2	0	2	0	2
85	Ghim Moh	0	0	0	0	0	2	0	0	0	0	0	0
86	Gombak	0	0	0	0	0	0	0	0	0	0	0	0
87	Goodwood Park	0	0	0	0	0	0	0	0	0	0	0	0
88	Greenwood Park	0	0	0	0	0	0	0	0	0	0	0	0
89	Guilin	0	0	0	0	0	0	0	0	0	0	0	0
90	Gul Basin	0	0	0	0	0	0	0	0	0	0	0	0
91	Gul Circle	0	0	0	0	0	0	0	0	0	0	0	0
92	Henderson Hill	0	0	0	1	0	8	2	0	0	0	0	0
93	Hillcrest	0	0	0	0	0	0	0	0	0	0	0	0
94	Hillview	0	0	1	0	0	0	0	0	0	0	0	0
95	Holland Drive	0	0	0	0	0	0	0	0	0	0	0	0
96	Holland Road	0	0	0	0	0	0	0	0	0	0	0	0
97	Hong Kah	4	3	0	0	0	2	0	0	0	0	0	3
98	Hong Kah North	0	0	0	0	1	0	0	0	0	0	0	0
99	Hougang Central	0	0	0	0	0	0	0	0	0	0	0	0
100	Hougang East	0	0	0	0	0	0	0	0	0	0	0	0
101	Hougang West	0	0	0	0	0	0	0	0	0	0	0	0
102	Institution Hill	0	0	0	0	0	0	0	0	0	0	0	0
103	International Business Park	0	0	0	0	0	0	0	0	0	0	0	0
104	Istana Negara	0	0	0	0	0	0	0	0	0	0	0	0
105	Jelebu	0	0	0	0	2	5	2	0	0	0	0	18
106	Joo Koon	0	0	0	0	0	0	0	0	0	0	0	0
107	Joo Seng	0	0	0	0	0	0	0	0	0	0	2	0
108	Jurong Gateway	0	0	0	0	0	0	0	0	0	0	0	0
109	Jurong Island And Bukom	0	0	0	0	0	0	0	0	2	0	0	0
110	Jurong Port	0	0	0	0	0	0	0	0	0	0	0	0
111	Jurong River	0	0	0	0	0	0	0	0	0	0	0	0
112	Jurong West Central	0	0	0	0	2	0	2	0	0	0	2	0
113	Kaki Bukit	0	23	12	16	0	2	0	0	0	12	70	100
114	Kallang Bahru	0	0	0	0	0	0	0	0	0	0	0	0
115	Kallang Way	0	0	0	0	0	0	0	0	0	1	1	2
116	Kampong Bugis	0	0	0	0	0	0	0	0	0	0	0	0
117	Kampong Glam	0	0	0	0	0	0	0	0	0	0	0	0
118	Kampong Java	0	0	0	0	0	0	0	0	0	0	0	6
119	Kampong Tiong Bahru	0	0	0	0	0	0	0	0	0	0	0	0
120	Kampong Ubi	0	0	0	0	0	0	0	0	0	0	0	3
121	Kangkar	26	15	1	0	0	0	0	0	0	0	0	12
122	Katong	0	0	1	0	0	0	0	3	4	0	0	0
123	Keat Hong	3	0	0	0	0	0	0	0	0	2	0	2
124	Kebun Bahru	0	0	0	0	0	0	1	0	0	1	0	0
125	Kembangan	0	0	2	0	0	0	0	2	0	0	0	4
126	Kent Ridge	0	0	0	0	0	0	0	0	0	0	0	0
127	Khatib	2	0	0	0	0	0	0	0	0	1	0	0
128	Kian Teck	0	0	0	0	0	0	0	0	0	0	0	0
129	Kim Keat	0	0	0	0	0	0	0	0	0	0	0	0
130	Kovan	0	0	0	0	0	0	0	0	0	0	0	0
131	Kranji	0	0	0	0	0	0	0	0	0	0	0	0
132	Lakeside	0	0	0	0	0	0	1	1	2	0	0	0
133	Lavender	0	0	0	0	0	0	0	0	0	0	0	0
134	Leedon Park	0	0	0	0	0	0	0	0	0	5	0	0
135	Leonie Hill	0	0	0	0	0	0	0	0	0	0	0	0
136	Lim Chu Kang	0	0	0	0	0	0	0	0	0	0	0	0
137	Little India	0	0	0	0	0	0	0	0	0	0	0	0
138	Liu Fang	0	0	0	0	0	0	0	0	0	0	0	0
139	Lorong 8 Toa Payoh	0	0	0	0	0	0	0	0	0	0	0	0
140	Lorong Ah Soo	0	0	0	0	0	0	0	0	1	0	0	8
141	Lorong Chuan	0	0	0	0	0	0	0	0	0	0	0	0
142	Lorong Halus	0	0	0	0	0	0	0	0	0	0	0	0
143	Lorong Halus North	0	0	0	0	0	0	0	0	0	0	0	0
144	Lower Seletar	0	0	0	0	0	0	0	0	0	0	0	0
145	Loyang East	0	0	0	0	0	0	0	0	0	0	0	0
146	Loyang West	0	0	0	0	0	0	0	0	0	0	0	0
147	Mackenzie	0	0	0	0	0	0	0	0	0	0	0	0
148	Macpherson	0	0	0	0	2	0	0	0	0	0	0	0
149	Malcolm	0	0	0	0	0	0	0	0	0	0	0	4
150	Mandai East	0	0	0	0	0	0	0	0	0	0	0	0
151	Mandai Estate	0	0	0	0	0	0	0	0	0	0	0	0
152	Mandai West	0	0	0	0	0	0	0	0	0	0	0	0
153	Margaret Drive	0	0	0	0	0	0	0	0	0	0	0	0
154	Marina Centre	0	0	0	0	0	0	0	0	0	0	0	0
155	Marina East	0	0	0	0	0	0	0	0	0	0	0	0
156	Marina East (Mp)	0	0	0	0	0	0	0	0	0	0	0	0
157	Marina South	0	0	0	0	0	0	0	0	0	0	0	0
158	Marine Parade	0	0	0	0	0	0	0	0	0	2	8	0
159	Maritime Square	0	0	0	0	0	0	0	0	0	0	0	0
160	Marymount	0	0	0	0	0	0	0	0	0	0	0	0
161	Matilda	0	0	0	0	0	0	0	0	0	0	0	0
162	Maxwell	0	0	0	0	0	0	0	0	0	0	0	0
163	Mei Chin	0	0	0	0	0	0	2	0	0	0	1	3
164	Midview	0	0	0	0	0	0	0	0	0	0	0	8
165	Monk'S Hill	0	0	0	0	0	0	0	0	0	0	0	0
166	Moulmein	0	0	0	0	0	0	4	0	0	0	0	0
167	Mount Emily	0	0	0	0	0	0	0	0	0	0	0	0
168	Mount Pleasant	0	0	0	0	0	0	0	0	0	0	0	0
169	Mountbatten	0	0	0	0	0	0	0	4	0	0	0	0
170	Nassim	0	0	0	0	0	0	0	0	2	0	0	0
171	National University Of S'Pore	0	0	0	0	0	0	0	0	1	1	0	0
172	Nature Reserve	0	0	0	0	0	0	0	0	0	0	0	0
173	Nee Soon	0	0	0	0	0	0	0	0	0	0	0	0
174	Newton Circus	0	0	0	0	0	0	0	0	0	0	0	0
175	North Coast	0	0	0	0	0	0	0	0	0	0	0	0
176	North-Eastern Islands	0	0	0	0	0	0	0	0	0	0	0	0
177	Northland	0	0	0	4	0	2	1	0	6	9	0	6
178	Northshore	0	0	0	0	0	0	0	0	0	0	0	0
179	One North	0	0	0	0	0	0	0	0	0	0	0	0
180	One Tree Hill	0	0	0	0	0	0	0	0	0	0	0	0
181	Orange Grove	0	0	0	0	0	0	0	0	0	0	0	0
182	Oxley	0	0	0	0	0	0	0	0	0	0	0	0
183	Pandan	0	0	0	0	0	0	0	0	0	0	0	0
184	Pang Sua	0	0	0	0	0	0	0	0	0	0	0	0
185	Pasir Panjang 1	0	0	0	0	0	0	0	0	0	0	0	0
186	Pasir Panjang 2	0	0	0	0	0	0	0	0	0	0	0	0
187	Pasir Ris Central	11	0	0	0	0	0	0	0	0	3	6	4
188	Pasir Ris Drive	3	0	0	0	2	5	0	0	0	0	0	0
189	Pasir Ris Park	0	0	0	0	0	0	0	0	0	0	0	0
190	Pasir Ris Wafer Fab Park	0	0	0	0	0	0	0	0	0	0	0	0
191	Pasir Ris West	0	0	0	0	0	0	0	0	0	2	5	0
192	Paterson	0	0	0	0	0	0	0	0	0	0	0	0
193	Paya Lebar East	0	0	0	0	0	0	0	0	0	0	0	0
194	Paya Lebar North	0	0	0	0	0	0	0	0	0	0	0	0
195	Paya Lebar West	0	0	0	0	0	0	0	0	0	0	0	0
196	Pearl'S Hill	0	0	1	0	0	0	0	0	0	0	0	0
197	Pei Chun	0	0	0	2	0	0	0	0	0	0	0	0
198	Peng Siang	0	0	0	0	0	0	0	0	0	0	0	0
199	Penjuru Crescent	0	0	0	0	0	0	0	0	0	0	0	0
200	People'S Park	0	0	0	0	0	0	0	0	0	0	0	0
201	Phillip	0	0	0	0	0	0	0	0	0	0	0	0
202	Pioneer Sector	0	0	0	0	0	0	0	0	0	0	0	0
203	Plab	0	0	0	0	0	0	0	0	0	0	0	0
204	Port	0	0	0	0	0	0	0	0	0	0	0	0
205	Potong Pasir	0	0	0	0	0	0	0	0	0	0	0	0
206	Pulau Punggol Barat	0	0	0	0	0	0	0	0	0	1	1	0
207	Pulau Punggol Timor	0	0	0	0	0	0	0	0	0	0	0	0
208	Pulau Seletar	0	0	0	0	0	0	0	0	0	0	0	0
209	Punggol Canal	0	0	0	0	0	0	0	0	0	0	0	0
210	Punggol Field	0	0	0	0	0	3	21	0	0	0	0	0
211	Punggol Town Centre	0	0	0	0	0	0	0	0	0	0	0	0
212	Queensway	0	0	0	0	0	0	0	0	0	0	0	0
213	Raffles Place	0	0	0	0	0	0	0	0	0	0	0	0
214	Redhill	0	0	0	4	0	3	11	6	0	4	4	0
215	Reservoir View	0	0	0	0	0	0	0	0	0	0	0	0
216	Ridout	0	0	0	0	0	0	0	0	0	0	0	0
217	Rivervale	0	0	0	0	0	0	0	0	0	0	4	0
218	Robertson Quay	0	0	0	0	0	0	0	0	0	0	0	0
219	Rochor Canal	0	0	0	0	0	0	0	0	0	0	0	0
220	Safti	0	0	0	0	0	0	0	0	0	0	0	0
221	Samulun	0	0	0	0	0	0	0	0	0	0	0	0
222	Saujana	0	0	0	0	0	0	2	2	0	0	0	0
223	Selegie	0	0	0	0	0	0	0	0	0	0	0	0
224	Seletar	0	0	0	0	0	0	0	0	0	0	0	0
225	Seletar Aerospace Park	0	0	0	0	0	0	0	0	0	0	0	0
226	Seletar Hills	0	0	0	0	0	0	0	0	0	0	0	0
227	Semakau	0	0	0	0	0	0	0	0	0	0	0	0
228	Sembawang Central	0	0	0	0	0	0	0	0	0	0	0	0
229	Sembawang East	0	0	0	0	0	0	2	12	2	0	0	0
230	Sembawang Hills	0	0	0	0	0	0	0	0	4	17	0	1
231	Sembawang North	0	0	0	0	0	0	0	0	0	0	0	0
232	Sembawang Springs	0	0	0	0	0	0	1	4	0	0	0	0
233	Sembawang Straits	0	0	0	0	0	0	0	0	0	0	0	0
234	Sengkang Town Centre	0	0	0	0	0	0	0	0	0	0	0	0
235	Sengkang West	0	0	0	0	0	0	0	0	0	0	0	0
236	Senja	0	0	0	0	0	0	0	0	0	0	0	0
237	Sennett	0	0	0	0	0	0	0	0	0	1	1	2
238	Senoko North	0	0	0	0	0	0	0	0	0	0	0	9
239	Senoko South	0	0	0	0	0	0	0	0	0	0	0	0
240	Senoko West	0	0	0	0	0	0	0	0	0	0	0	0
241	Sentosa	0	0	0	0	0	0	0	0	0	0	0	0
242	Serangoon Central	0	0	0	0	0	0	0	0	7	0	0	0
243	Serangoon Garden	0	0	0	0	0	0	0	0	2	0	0	0
244	Serangoon North	0	0	0	0	0	0	0	0	0	0	0	0
245	Serangoon North Ind Estate	0	0	0	0	0	0	0	0	0	0	0	0
246	Shangri-La	0	0	0	0	0	0	0	0	0	0	0	0
247	Shipyard	0	0	0	0	0	0	0	0	0	0	0	0
248	Siglap	0	0	0	0	1	2	1	0	0	0	0	0
249	Simei	0	0	0	0	0	0	0	0	0	0	0	3
250	Simpang North	0	0	0	0	0	0	0	0	0	0	0	0
251	Simpang South	0	0	0	0	0	0	0	0	0	0	0	0
252	Singapore General Hospital	0	0	0	0	0	0	0	0	0	0	0	0
253	Singapore Polytechnic	0	0	0	0	0	0	0	0	0	0	0	0
254	Somerset	0	0	0	0	0	0	0	0	0	0	0	0
255	Southern Group	0	0	0	0	0	0	0	0	0	0	0	0
256	Springleaf	0	0	0	0	0	0	0	0	0	0	0	0
257	Straits View	0	0	0	0	0	0	0	0	0	0	0	0
258	Sudong	0	0	0	0	0	0	0	0	0	0	0	0
259	Sungei Road	0	0	0	0	0	0	0	0	0	0	0	0
260	Sunset Way	0	0	0	0	0	0	0	0	0	0	0	0
261	Swiss Club	0	0	0	0	0	0	0	0	0	0	0	0
262	Tagore	0	0	0	0	0	0	0	0	0	0	0	0
263	Tai Seng	0	0	0	0	0	0	1	0	0	0	0	2
264	Taman Jurong	0	0	0	0	2	0	1	0	2	4	3	3
265	Tampines East	28	29	8	2	3	16	7	12	3	0	0	3
266	Tampines North	0	0	0	0	0	0	0	0	0	0	0	0
267	Tampines West	0	0	0	0	0	0	0	2	0	0	0	0
268	Tanglin	0	0	0	0	0	0	0	0	0	0	0	0
269	Tanglin Halt	0	0	0	0	0	0	0	0	0	0	0	0
270	Tanjong Irau	0	0	0	0	0	0	0	0	0	0	0	0
271	Tanjong Pagar	0	0	0	0	0	0	0	0	0	0	0	0
272	Tanjong Rhu	0	0	0	0	0	0	0	0	0	0	0	0
273	Teban Gardens	0	0	0	0	0	0	0	0	0	0	0	9
274	Teck Whye	0	0	0	0	0	0	0	0	0	0	0	0
275	Telok Blangah Drive	0	0	0	0	0	0	0	0	0	0	0	0
276	Telok Blangah Rise	0	0	0	0	0	0	0	0	0	0	0	0
277	Telok Blangah Way	0	0	0	0	0	0	0	0	0	0	0	0
278	Tengah	0	0	0	0	0	0	0	0	0	0	0	0
279	Tengeh	0	0	0	0	0	0	0	0	0	0	0	0
280	The Wharves	0	0	0	0	0	0	0	0	0	0	0	0
281	Tiong Bahru	0	0	0	0	0	0	0	0	0	0	0	0
282	Tiong Bahru Station	0	0	0	0	0	0	0	2	0	0	0	0
283	Toa Payoh Central	0	0	0	0	0	0	0	0	0	0	0	0
284	Toa Payoh West	0	0	0	0	0	0	0	0	0	0	0	0
285	Toh Guan	0	0	0	0	0	0	0	1	0	0	0	2
286	Toh Tuck	0	0	0	0	0	0	0	0	0	0	0	0
287	Townsville	0	0	0	0	0	0	2	0	0	0	0	0
288	Trafalgar	0	0	0	0	0	0	0	0	0	0	2	2
289	Tuas Bay	0	0	0	0	0	0	0	0	0	0	0	0
290	Tuas North	0	0	0	0	0	0	0	0	0	0	0	0
291	Tuas Promenade	0	0	0	0	0	0	0	0	0	0	0	0
292	Tuas View	0	0	0	0	0	0	0	0	0	0	0	0
293	Tuas View Extension	0	0	0	0	0	0	0	0	0	0	0	0
294	Tukang	0	0	0	0	0	0	0	0	0	0	0	0
295	Turf Club	0	0	0	0	0	0	0	0	0	0	0	0
296	Tyersall	0	0	0	0	0	0	0	0	1	0	2	0
297	Ulu Pandan	0	0	0	0	0	0	0	0	0	0	0	0
298	Upper Paya Lebar	0	0	0	0	0	0	0	0	4	0	0	3
299	Upper Thomson	0	0	0	0	0	0	0	0	0	0	0	0
300	Victoria	0	0	0	0	0	0	0	0	0	0	0	0
301	Waterway East	0	0	0	0	0	0	0	0	0	0	2	0
302	Wenya	0	0	0	0	0	0	0	0	0	0	0	0
303	West Coast	0	0	0	0	0	0	0	0	0	0	0	0
304	Western Water Catchment	0	0	0	0	0	0	0	0	0	0	0	0
305	Woodgrove	0	0	0	0	0	0	0	0	0	0	0	1
306	Woodlands East	0	0	0	0	0	0	2	12	7	28	62	31
307	Woodlands Regional Centre	0	0	0	0	0	0	0	0	0	0	0	0
308	Woodlands South	0	0	0	0	0	0	0	0	0	8	4	2
309	Woodlands West	0	0	0	0	0	0	0	0	0	0	0	0
310	Woodleigh	0	0	0	0	0	0	0	0	0	0	0	0
311	Xilin	0	0	0	0	0	0	0	0	2	0	0	0
312	Yew Tee	0	0	0	0	0	0	0	0	0	0	0	0
313	Yio Chu Kang	0	0	0	0	0	0	0	0	0	0	0	0
314	Yio Chu Kang East	0	0	0	0	0	0	0	0	0	0	0	0
315	Yio Chu Kang North	0	0	0	0	0	0	0	0	0	0	0	0
316	Yio Chu Kang West	0	0	0	0	0	0	3	0	0	0	0	2
317	Yishun Central	0	0	0	0	0	0	0	0	0	0	0	0
318	Yishun East	0	0	0	0	0	0	0	0	0	0	0	3
319	Yishun South	2	0	0	0	0	0	0	0	0	0	0	0
320	Yishun West	0	0	0	0	0	0	6	16	49	14	0	6
321	Yuhua East	0	0	0	0	0	0	0	0	2	0	0	0
322	Yuhua West	0	0	0	0	0	0	0	0	0	0	0	0
323	Yunnan	0	0	2	29	72	23	2	0	0	0	0	18
		96	81	40	113	143	149	112	98	118	136	229	379	1694	Total
														141.167	Monthly avg.

## Sheet: 2019
S.No	SUBZONE_Name	Jan	April	May	June	July	Aug	Sep	Oct	Nov	Dec
1	Admiralty	0	0	2	5	0	6	4	0	0	0
2	Airport Road	0	0	0	0	0	0	0	0	0	0
3	Alexandra Hill	3	0	0	0	3	0	0	0	0	0
4	Alexandra North	0	0	0	0	0	0	0	0	0	0
5	Aljunied	8	16	106	247	302	228	36	0	7	6
6	Anak Bukit	11	0	2	2	0	7	10	4	6	0
7	Anchorvale	0	0	0	8	3	10	13	3	3	0
8	Ang Mo Kio Town Centre	0	0	0	0	5	1	3	0	3	0
9	Anson	0	0	0	0	0	0	0	0	0	0
10	Balestier	4	0	0	3	6	14	6	0	0	2
11	Bangkit	0	0	0	0	10	39	8	7	17	10
12	Bayfront Subzone	0	0	0	0	0	0	0	0	0	0
13	Bayshore	0	0	0	0	0	0	0	2	0	0
14	Bedok North	4	13	34	110	176	103	17	21	29	17
15	Bedok Reservoir	0	3	13	18	42	36	7	4	0	0
16	Bedok South	77	0	6	12	34	84	11	4	6	2
17	Bencoolen	0	0	0	0	0	0	4	0	0	0
18	Bendemeer	0	0	3	12	13	37	10	2	0	3
19	Benoi Sector	0	0	0	0	0	0	0	0	0	0
20	Bidadari	0	0	0	0	0	0	0	0	0	0
21	Bishan East	0	0	0	0	8	88	105	29	20	0
22	Boat Quay	0	0	0	0	0	0	0	0	0	0
23	Boon Keng	0	2	4	8	28	12	0	0	8	0
24	Boon Lay Place	0	1	1	9	60	30	0	2	4	4
25	Boon Teck	0	0	0	2	24	26	1	4	0	0
26	Boulevard	0	0	0	0	0	0	0	0	0	0
27	Braddell	0	0	0	2	10	78	49	22	6	0
28	Bras Basah	0	0	0	0	0	0	0	0	0	0
29	Brickworks	0	0	0	0	3	0	0	0	2	0
30	Bugis	0	0	0	2	0	0	0	0	0	0
31	Bukit Batok Central	0	0	0	0	3	28	15	0	4	4
32	Bukit Batok East	2	0	0	0	0	5	3	0	0	0
33	Bukit Batok South	2	0	0	2	2	4	0	0	0	0
34	Bukit Batok West	0	0	0	0	4	0	8	0	2	11
35	Bukit Ho Swee	0	0	0	0	6	7	5	2	0	0
36	Bukit Merah	0	0	0	0	0	0	0	0	0	0
37	Cairnhill	0	0	0	0	2	4	6	0	8	4
38	Cecil	0	0	0	0	0	0	0	0	0	0
39	Central Subzone	0	0	0	0	0	0	0	0	0	0
40	Central Water Catchment	0	0	0	0	0	0	0	0	0	0
41	Changi Airport	0	0	0	0	0	0	0	0	0	0
42	Changi Bay	0	0	0	0	0	0	0	0	0	0
43	Changi Point	0	0	0	0	0	0	0	0	0	0
44	Changi West	0	0	0	0	0	0	1	0	0	0
45	Chatsworth	2	0	0	4	4	22	41	6	0	0
46	Cheng San	0	0	0	0	8	37	18	26	24	15
47	Chin Bee	0	0	0	0	0	0	0	0	0	0
48	China Square	0	0	0	0	0	0	0	0	0	0
49	Chinatown	0	0	0	0	2	1	0	0	0	4
50	Choa Chu Kang Central	0	0	9	13	15	36	22	15	40	19
51	Choa Chu Kang North	0	0	0	6	16	34	9	18	0	2
52	Chong Boon	4	0	1	7	28	139	123	15	35	5
53	City Hall	0	0	0	0	0	0	0	0	0	0
54	City Terminals	0	0	0	0	0	0	0	0	0	0
55	Clarke Quay	0	0	0	0	0	0	0	0	0	0
56	Clementi Central	0	0	0	4	0	0	0	0	1	0
57	Clementi North	6	0	0	0	0	0	0	5	2	4
58	Clementi West	2	0	0	4	2	0	0	0	0	0
59	Clementi Woods	0	0	0	2	0	0	0	0	0	1
60	Clifford Pier	0	0	0	0	0	0	0	0	0	0
61	Commonwealth	2	0	0	2	24	66	3	0	0	0
62	Compassvale	0	0	0	0	19	13	5	8	1	0
63	Coney Island	0	0	0	0	0	0	0	0	0	0
64	Coronation Road	0	0	0	0	0	0	0	0	0	0
65	Crawford	0	0	0	0	2	0	0	0	0	0
66	Dairy Farm	9	0	0	0	0	0	8	8	5	4
67	Defu Industrial Park	0	5	13	16	6	1	0	0	0	0
68	Depot Road	0	0	0	0	0	0	0	0	0	0
69	Dhoby Ghaut	0	0	0	0	0	0	0	0	0	0
70	Dover	0	0	0	0	0	0	0	0	2	0
71	Dunearn	0	0	0	2	4	2	0	0	0	0
72	East Coast	0	0	0	0	0	0	0	0	0	0
73	Everton Park	0	0	0	0	2	3	0	0	0	0
74	Faber	0	0	0	0	0	4	9	3	6	0
75	Fajar	2	0	4	0	0	3	0	3	23	28
76	Farrer Court	0	0	0	0	0	1	0	0	0	0
77	Farrer Park	0	0	0	0	7	8	0	0	0	0
78	Fernvale	0	0	2	0	9	9	2	7	5	4
79	Flora Drive	0	0	2	0	17	48	28	12	0	0
80	Fort Canning	0	0	0	0	0	0	0	0	0	0
81	Frankel	3	21	46	154	212	111	38	18	27	17
82	Gali Batu	0	0	0	0	1	0	0	0	0	0
83	Geylang Bahru	0	0	3	9	23	33	0	0	0	0
84	Geylang East	4	5	7	22	66	59	33	9	5	4
85	Ghim Moh	0	0	0	0	2	2	0	0	0	2
86	Gombak	0	0	0	0	10	25	0	0	0	0
87	Goodwood Park	0	0	0	0	0	0	0	0	0	0
88	Greenwood Park	0	0	0	0	0	0	0	0	0	0
89	Guilin	0	0	0	0	1	0	0	0	0	0
90	Gul Basin	0	0	0	0	0	0	0	0	0	0
91	Gul Circle	0	0	0	0	0	0	0	0	0	0
92	Henderson Hill	0	0	0	0	0	0	0	0	2	0
93	Hillcrest	0	0	0	0	0	0	0	0	0	0
94	Hillview	0	0	0	0	1	6	0	0	0	0
95	Holland Drive	0	0	1	0	23	79	58	4	0	0
96	Holland Road	0	0	0	0	3	3	0	0	0	0
97	Hong Kah	0	3	6	11	24	37	21	14	23	15
98	Hong Kah North	0	0	0	0	4	26	0	0	12	3
99	Hougang Central	0	0	0	4	21	9	0	0	0	0
100	Hougang East	0	13	0	2	3	4	4	4	2	0
101	Hougang West	42	0	11	31	24	69	54	5	0	17
102	Institution Hill	0	0	0	0	0	2	0	0	0	0
103	International Business Park	0	0	0	0	0	0	0	0	0	0
104	Istana Negara	0	0	0	0	0	0	0	0	0	0
105	Jelebu	28	10	0	0	4	7	0	3	19	95
106	Joo Koon	0	0	0	0	0	0	0	0	2	0
107	Joo Seng	0	2	0	8	25	13	0	0	11	0
108	Jurong Gateway	0	0	0	0	0	0	0	0	0	0
109	Jurong Island And Bukom	0	0	0	0	0	0	0	0	0	0
110	Jurong Port	0	0	0	0	0	0	0	0	0	0
111	Jurong River	0	0	0	2	0	0	0	0	0	0
112	Jurong West Central	4	0	0	2	10	28	16	54	85	24
113	Kaki Bukit	218	25	43	43	76	31	15	51	122	31
114	Kallang Bahru	0	0	0	0	0	0	0	0	0	0
115	Kallang Way	2	0	0	5	0	2	0	0	0	0
116	Kampong Bugis	0	0	0	2	3	1	0	0	0	0
117	Kampong Glam	0	0	0	0	0	0	0	0	0	0
118	Kampong Java	8	0	1	0	2	6	0	0	0	0
119	Kampong Tiong Bahru	0	0	0	0	0	0	0	0	0	0
120	Kampong Ubi	3	2	8	4	29	1	6	0	3	0
121	Kangkar	29	16	6	8	31	5	12	4	0	0
122	Katong	0	0	0	2	8	19	13	1	1	5
123	Keat Hong	4	0	2	3	10	70	95	94	152	132
124	Kebun Bahru	0	0	1	12	7	4	2	4	25	40
125	Kembangan	22	10	83	154	217	216	94	108	51	37
126	Kent Ridge	0	0	0	0	0	0	0	0	0	0
127	Khatib	0	0	0	0	0	0	0	0	0	0
128	Kian Teck	0	0	0	0	0	0	0	0	0	0
129	Kim Keat	0	0	0	2	36	5	3	0	0	0
130	Kovan	4	7	9	0	0	7	27	11	47	68
131	Kranji	0	0	0	0	1	0	0	0	1	0
132	Lakeside	0	0	0	0	0	2	0	0	0	0
133	Lavender	2	0	0	0	8	13	2	1	0	0
134	Leedon Park	0	0	0	0	0	5	0	1	0	0
135	Leonie Hill	0	0	0	0	0	0	0	0	0	0
136	Lim Chu Kang	0	0	0	0	0	0	0	0	0	0
137	Little India	0	0	2	10	37	65	20	1	0	0
138	Liu Fang	0	0	0	0	0	0	0	0	0	0
139	Lorong 8 Toa Payoh	0	0	0	0	1	5	3	0	2	2
140	Lorong Ah Soo	8	0	9	72	92	130	97	7	41	46
141	Lorong Chuan	0	2	0	0	0	3	4	0	0	0
142	Lorong Halus	0	0	0	0	0	0	0	0	0	0
143	Lorong Halus North	0	0	0	0	0	0	0	0	0	0
144	Lower Seletar	6	0	2	2	8	15	1	1	0	0
145	Loyang East	0	0	0	0	0	1	0	0	4	0
146	Loyang West	0	0	0	0	0	0	0	0	0	0
147	Mackenzie	0	0	0	0	0	0	0	0	0	0
148	Macpherson	4	0	0	0	55	98	4	0	8	7
149	Malcolm	0	0	0	0	2	0	0	0	0	0
150	Mandai East	0	0	0	0	1	0	0	0	0	0
151	Mandai Estate	0	0	0	0	0	0	0	0	0	0
152	Mandai West	0	0	0	0	0	0	0	0	0	0
153	Margaret Drive	0	0	0	2	9	0	0	2	5	7
154	Marina Centre	0	0	0	0	0	0	0	0	0	0
155	Marina East	0	0	0	0	0	0	0	0	0	0
156	Marina East (Mp)	0	0	0	0	0	0	0	0	0	0
157	Marina South	0	0	0	0	0	0	0	0	0	0
158	Marine Parade	0	0	0	3	16	69	23	6	3	4
159	Maritime Square	0	0	0	0	0	0	0	0	0	0
160	Marymount	0	0	0	5	48	135	143	14	8	1
161	Matilda	0	0	0	0	2	0	0	0	11	0
162	Maxwell	0	0	0	0	0	0	0	0	0	0
163	Mei Chin	23	0	0	1	0	6	4	0	0	4
164	Midview	3	49	63	80	40	35	30	7	2	6
165	Monk'S Hill	0	0	0	0	0	0	0	0	0	0
166	Moulmein	0	0	0	2	2	9	8	0	0	0
167	Mount Emily	0	0	0	0	6	5	0	0	0	0
168	Mount Pleasant	0	0	0	0	0	0	0	0	0	0
169	Mountbatten	0	0	2	4	17	16	2	0	2	0
170	Nassim	0	0	0	0	0	3	5	0	3	0
171	National University Of S'Pore	0	0	0	0	0	0	0	0	2	1
172	Nature Reserve	0	0	0	0	0	0	0	0	0	0
173	Nee Soon	0	0	0	0	0	0	0	0	0	0
174	Newton Circus	0	0	0	0	0	0	0	0	0	0
175	North Coast	0	0	0	0	0	1	5	0	6	0
176	North-Eastern Islands	0	0	0	0	0	0	0	0	0	0
177	Northland	4	0	0	2	0	2	2	0	0	0
178	Northshore	0	0	0	0	0	0	0	0	0	0
179	One North	0	0	0	0	0	0	0	0	0	0
180	One Tree Hill	0	0	0	0	0	0	0	0	0	0
181	Orange Grove	0	0	0	0	0	0	0	0	0	0
182	Oxley	0	0	0	0	0	0	0	0	0	0
183	Pandan	0	0	0	0	0	0	0	0	0	0
184	Pang Sua	0	0	0	0	0	0	0	0	0	0
185	Pasir Panjang 1	0	0	0	0	2	4	0	0	0	0
186	Pasir Panjang 2	0	0	0	0	0	0	0	0	0	0
187	Pasir Ris Central	2	0	2	1	8	7	34	5	14	10
188	Pasir Ris Drive	4	0	1	61	197	179	35	10	2	0
189	Pasir Ris Park	2	0	0	0	0	1	4	6	12	7
190	Pasir Ris Wafer Fab Park	0	0	0	0	0	0	0	0	0	0
191	Pasir Ris West	2	0	0	2	9	13	0	17	58	48
192	Paterson	0	0	0	0	0	0	0	0	0	0
193	Paya Lebar East	0	0	0	0	0	0	0	0	0	0
194	Paya Lebar North	0	0	0	0	0	0	0	0	0	0
195	Paya Lebar West	0	0	0	5	0	0	0	0	0	0
196	Pearl'S Hill	0	0	0	0	0	0	0	0	0	0
197	Pei Chun	0	0	0	4	17	2	0	0	7	3
198	Peng Siang	0	0	13	51	75	149	139	123	147	116
199	Penjuru Crescent	0	0	0	0	0	0	0	0	0	0
200	People'S Park	0	0	0	0	0	0	0	0	0	0
201	Phillip	0	0	0	0	0	0	0	0	0	0
202	Pioneer Sector	0	0	0	0	0	0	0	0	0	0
203	Plab	0	0	0	0	0	0	0	0	0	0
204	Port	0	0	0	0	0	0	0	0	0	0
205	Potong Pasir	0	0	0	0	10	26	6	0	0	0
206	Pulau Punggol Barat	0	0	0	0	1	2	0	0	0	0
207	Pulau Punggol Timor	0	0	0	0	0	0	0	0	0	0
208	Pulau Seletar	0	0	0	0	0	0	0	0	0	0
209	Punggol Canal	0	0	0	0	0	0	0	0	0	0
210	Punggol Field	3	0	0	0	7	2	0	0	2	0
211	Punggol Town Centre	0	0	0	0	1	0	0	2	2	2
212	Queensway	0	0	0	0	0	0	0	0	0	0
213	Raffles Place	0	0	0	0	0	0	0	0	0	0
214	Redhill	0	0	0	0	0	0	0	0	0	4
215	Reservoir View	0	0	0	0	1	2	0	0	0	0
216	Ridout	0	0	0	0	0	4	0	0	0	0
217	Rivervale	0	0	0	2	6	40	79	115	186	51
218	Robertson Quay	0	0	0	0	0	0	0	0	0	0
219	Rochor Canal	0	0	0	0	0	0	0	0	0	0
220	Safti	0	0	0	0	0	0	0	0	0	0
221	Samulun	0	0	0	0	0	0	0	0	0	0
222	Saujana	2	0	0	0	2	3	0	3	6	2
223	Selegie	0	0	0	0	0	0	1	0	0	0
224	Seletar	0	0	0	0	0	0	0	0	0	0
225	Seletar Aerospace Park	0	0	0	0	0	0	0	0	0	0
226	Seletar Hills	0	0	0	0	14	49	14	28	148	185
227	Semakau	0	0	0	0	0	0	0	0	0	0
228	Sembawang Central	4	6	2	3	4	12	0	0	0	2
229	Sembawang East	0	0	0	0	0	0	0	0	0	0
230	Sembawang Hills	1	7	22	26	10	0	1	4	0	12
231	Sembawang North	5	4	0	4	4	0	4	11	0	0
232	Sembawang Springs	0	0	0	0	0	0	4	6	4	2
233	Sembawang Straits	0	0	0	0	0	0	0	0	0	0
234	Sengkang Town Centre	0	0	2	6	4	2	18	29	17	11
235	Sengkang West	0	0	0	0	0	0	0	0	0	0
236	Senja	0	0	0	0	4	0	8	22	19	0
237	Sennett	6	11	34	51	22	2	0	0	0	0
238	Senoko North	2	0	0	0	0	0	0	0	0	0
239	Senoko South	0	0	0	0	0	0	0	0	0	0
240	Senoko West	0	0	0	0	0	2	5	3	1	0
241	Sentosa	0	0	0	0	0	0	0	0	0	0
242	Serangoon Central	0	0	0	15	5	2	0	0	4	0
243	Serangoon Garden	0	30	15	10	18	44	37	21	24	38
244	Serangoon North	0	0	0	1	3	0	0	2	12	2
245	Serangoon North Ind Estate	0	0	0	0	0	0	1	0	0	0
246	Shangri-La	0	0	6	3	7	5	0	0	1	14
247	Shipyard	0	0	0	0	0	0	0	0	0	0
248	Siglap	1	0	0	0	1	1	0	0	0	0
249	Simei	37	0	0	14	36	63	19	16	5	0
250	Simpang North	0	0	0	0	0	0	0	0	0	0
251	Simpang South	0	0	0	0	0	0	0	0	0	0
252	Singapore General Hospital	0	0	0	0	0	0	0	0	0	0
253	Singapore Polytechnic	0	0	0	0	0	0	0	0	0	0
254	Somerset	0	0	0	0	0	0	0	0	0	0
255	Southern Group	0	0	0	0	0	0	0	0	0	0
256	Springleaf	0	0	0	0	0	0	2	0	0	0
257	Straits View	0	0	0	0	0	0	0	0	0	0
258	Sudong	0	0	0	0	0	0	0	0	0	0
259	Sungei Road	0	0	0	0	2	16	0	0	0	0
260	Sunset Way	0	0	0	0	0	0	0	0	0	0
261	Swiss Club	0	0	0	0	0	0	0	0	0	0
262	Tagore	0	0	0	0	2	2	0	0	0	1
263	Tai Seng	4	0	0	3	30	72	62	0	0	0
264	Taman Jurong	3	0	4	16	6	10	3	2	2	2
265	Tampines East	10	2	2	38	82	89	70	48	25	0
266	Tampines North	0	0	0	0	0	0	0	0	0	0
267	Tampines West	4	0	0	5	15	29	8	7	5	2
268	Tanglin	0	0	0	0	0	0	0	0	0	0
269	Tanglin Halt	0	0	0	0	5	17	3	0	0	0
270	Tanjong Irau	0	0	0	0	0	0	0	0	0	0
271	Tanjong Pagar	0	0	0	0	0	0	0	0	0	2
272	Tanjong Rhu	0	0	2	3	2	7	16	44	10	0
273	Teban Gardens	24	0	0	0	4	2	0	0	0	0
274	Teck Whye	3	14	11	2	7	21	0	4	1	0
275	Telok Blangah Drive	0	0	0	2	3	2	2	0	6	2
276	Telok Blangah Rise	0	0	0	0	5	0	0	0	0	0
277	Telok Blangah Way	0	0	0	0	1	2	3	0	2	2
278	Tengah	0	0	0	0	0	0	0	0	0	0
279	Tengeh	0	0	0	0	0	0	0	0	0	0
280	The Wharves	0	0	0	0	0	0	0	0	0	0
281	Tiong Bahru	0	0	0	2	0	0	0	0	0	0
282	Tiong Bahru Station	0	0	0	0	2	7	0	0	0	0
283	Toa Payoh Central	0	18	0	17	17	30	8	4	0	0
284	Toa Payoh West	0	2	2	13	22	59	16	11	1	0
285	Toh Guan	0	0	0	0	0	7	0	0	2	0
286	Toh Tuck	0	0	0	0	3	0	0	0	0	0
287	Townsville	0	4	5	3	11	15	0	2	5	11
288	Trafalgar	6	0	2	7	3	10	28	23	50	56
289	Tuas Bay	0	0	0	0	0	0	0	0	0	0
290	Tuas North	0	0	0	0	0	0	0	0	0	0
291	Tuas Promenade	0	0	0	1	0	0	0	0	0	0
292	Tuas View	0	0	0	0	0	0	0	0	0	0
293	Tuas View Extension	0	0	0	0	0	0	0	0	0	1
294	Tukang	0	0	0	0	0	0	0	0	0	0
295	Turf Club	0	0	0	0	0	0	0	0	0	0
296	Tyersall	0	0	0	0	0	3	0	0	2	0
297	Ulu Pandan	0	0	0	2	0	0	0	0	0	4
298	Upper Paya Lebar	0	0	6	30	24	66	66	68	9	6
299	Upper Thomson	3	0	12	30	57	52	35	29	31	12
300	Victoria	0	0	0	0	0	0	0	0	0	0
301	Waterway East	4	0	4	2	10	7	0	0	10	0
302	Wenya	0	0	0	0	0	0	2	0	0	0
303	West Coast	0	0	0	0	0	0	0	0	5	9
304	Western Water Catchment	0	0	0	1	3	3	0	0	0	0
305	Woodgrove	0	0	3	0	2	4	0	0	12	1
306	Woodlands East	40	118	217	394	302	106	21	7	2	0
307	Woodlands Regional Centre	0	0	0	0	0	0	1	0	0	0
308	Woodlands South	4	5	19	72	42	6	4	5	2	7
309	Woodlands West	2	0	0	1	4	0	2	0	0	0
310	Woodleigh	0	0	0	1	2	0	0	0	0	0
311	Xilin	5	3	0	0	0	1	0	0	0	0
312	Yew Tee	2	0	2	6	13	35	8	0	6	0
313	Yio Chu Kang	0	0	0	0	0	0	0	0	0	0
314	Yio Chu Kang East	0	0	0	0	3	6	0	3	28	29
315	Yio Chu Kang North	0	0	0	0	0	0	0	0	0	0
316	Yio Chu Kang West	2	2	0	2	6	2	2	1	0	2
317	Yishun Central	0	0	0	0	0	0	0	0	0	0
318	Yishun East	0	16	35	34	4	4	0	2	0	4
319	Yishun South	30	16	1	4	0	2	0	0	0	0
320	Yishun West	9	0	0	8	13	12	6	4	2	10
321	Yuhua East	0	0	5	44	93	85	18	24	66	42
322	Yuhua West	0	0	0	5	0	0	0	4	0	0
323	Yunnan	69	0	2	13	6	6	3	2	72	46
		854	463	938	2185	3404	4185	2232	1373	1983	1477	19094	Total
												1909.4	monthly avg.

## Sheet: 2020
S.No	SUBZONE_Name	Jan	Feb	March
1	Admiralty	4	0	0
2	Airport Road	0	0	0
3	Alexandra Hill	0	8	0
4	Alexandra North	0	0	0
5	Aljunied	14	47	46
6	Anak Bukit	0	0	4
7	Anchorvale	4	0	6
8	Ang Mo Kio Town Centre	0	0	0
9	Anson	0	0	0
10	Balestier	10	15	16
11	Bangkit	3	1	0
12	Bayfront Subzone	0	0	0
13	Bayshore	0	0	0
14	Bedok North	37	16	7
15	Bedok Reservoir	0	0	0
16	Bedok South	0	8	6
17	Bencoolen	0	0	0
18	Bendemeer	27	5	9
19	Benoi Sector	0	0	0
20	Bidadari	0	0	0
21	Bishan East	15	12	2
22	Boat Quay	0	0	0
23	Boon Keng	0	8	0
24	Boon Lay Place	2	4	2
25	Boon Teck	0	6	0
26	Boulevard	0	0	2
27	Braddell	0	2	2
28	Bras Basah	0	0	0
29	Brickworks	9	4	4
30	Bugis	0	0	0
31	Bukit Batok Central	2	5	5
32	Bukit Batok East	6	1	0
33	Bukit Batok South	5	0	0
34	Bukit Batok West	24	5	0
35	Bukit Ho Swee	0	0	0
36	Bukit Merah	0	0	0
37	Cairnhill	21	20	18
38	Cecil	0	0	0
39	Central Subzone	0	0	0
40	Central Water Catchment	0	0	0
41	Changi Airport	0	0	0
42	Changi Bay	0	0	0
43	Changi Point	0	0	0
44	Changi West	0	0	0
45	Chatsworth	0	0	0
46	Cheng San	17	44	14
47	Chin Bee	0	0	0
48	China Square	0	0	0
49	Chinatown	0	0	0
50	Choa Chu Kang Central	8	0	0
51	Choa Chu Kang North	13	4	6
52	Chong Boon	41	109	74
53	City Hall	0	0	0
54	City Terminals	0	0	0
55	Clarke Quay	0	0	0
56	Clementi Central	0	5	1
57	Clementi North	3	0	0
58	Clementi West	0	4	3
59	Clementi Woods	12	0	0
60	Clifford Pier	0	0	0
61	Commonwealth	4	2	0
62	Compassvale	19	35	0
63	Coney Island	0	0	0
64	Coronation Road	0	0	0
65	Crawford	0	0	0
66	Dairy Farm	4	1	5
67	Defu Industrial Park	0	0	2
68	Depot Road	0	1	0
69	Dhoby Ghaut	0	0	0
70	Dover	5	1	0
71	Dunearn	1	1	0
72	East Coast	0	0	0
73	Everton Park	0	3	1
74	Faber	4	0	0
75	Fajar	10	15	0
76	Farrer Court	0	0	0
77	Farrer Park	0	0	0
78	Fernvale	1	1	5
79	Flora Drive	2	0	0
80	Fort Canning	0	0	0
81	Frankel	16	18	12
82	Gali Batu	0	0	0
83	Geylang Bahru	0	11	11
84	Geylang East	11	19	7
85	Ghim Moh	2	6	0
86	Gombak	0	10	10
87	Goodwood Park	0	0	0
88	Greenwood Park	0	0	0
89	Guilin	0	5	7
90	Gul Basin	0	0	0
91	Gul Circle	0	0	0
92	Henderson Hill	0	2	0
93	Hillcrest	0	0	0
94	Hillview	2	23	24
95	Holland Drive	0	0	0
96	Holland Road	0	1	0
97	Hong Kah	6	26	6
98	Hong Kah North	11	31	7
99	Hougang Central	0	0	0
100	Hougang East	5	2	2
101	Hougang West	24	69	42
102	Institution Hill	0	0	0
103	International Business Park	0	0	0
104	Istana Negara	0	0	0
105	Jelebu	142	57	25
106	Joo Koon	0	0	0
107	Joo Seng	0	5	2
108	Jurong Gateway	0	0	0
109	Jurong Island And Bukom	0	3	2
110	Jurong Port	0	0	0
111	Jurong River	0	0	0
112	Jurong West Central	40	8	10
113	Kaki Bukit	2	18	7
114	Kallang Bahru	0	0	0
115	Kallang Way	0	4	0
116	Kampong Bugis	0	0	0
117	Kampong Glam	0	0	0
118	Kampong Java	0	0	0
119	Kampong Tiong Bahru	0	0	0
120	Kampong Ubi	2	2	0
121	Kangkar	0	2	0
122	Katong	21	40	31
123	Keat Hong	34	2	0
124	Kebun Bahru	29	24	0
125	Kembangan	74	27	15
126	Kent Ridge	0	0	0
127	Khatib	13	12	0
128	Kian Teck	0	0	0
129	Kim Keat	0	0	0
130	Kovan	78	26	8
131	Kranji	0	0	0
132	Lakeside	0	0	0
133	Lavender	0	0	0
134	Leedon Park	0	0	0
135	Leonie Hill	0	0	1
136	Lim Chu Kang	0	0	0
137	Little India	0	0	0
138	Liu Fang	0	0	0
139	Lorong 8 Toa Payoh	1	1	0
140	Lorong Ah Soo	44	32	41
141	Lorong Chuan	3	4	14
142	Lorong Halus	0	0	0
143	Lorong Halus North	0	0	0
144	Lower Seletar	2	1	0
145	Loyang East	0	0	0
146	Loyang West	0	0	0
147	Mackenzie	0	0	0
148	Macpherson	33	10	3
149	Malcolm	0	0	0
150	Mandai East	0	0	0
151	Mandai Estate	0	0	0
152	Mandai West	0	0	0
153	Margaret Drive	3	0	0
154	Marina Centre	0	0	0
155	Marina East	0	0	0
156	Marina East (Mp)	0	0	0
157	Marina South	0	0	0
158	Marine Parade	11	4	5
159	Maritime Square	0	0	0
160	Marymount	2	8	1
161	Matilda	2	5	0
162	Maxwell	0	0	0
163	Mei Chin	0	1	0
164	Midview	61	79	4
165	Monk'S Hill	0	0	2
166	Moulmein	6	11	11
167	Mount Emily	0	3	0
168	Mount Pleasant	0	0	0
169	Mountbatten	13	4	0
170	Nassim	0	0	0
171	National University Of S'Pore	0	0	0
172	Nature Reserve	0	3	2
173	Nee Soon	0	0	0
174	Newton Circus	2	0	0
175	North Coast	0	0	0
176	North-Eastern Islands	0	0	0
177	Northland	0	0	0
178	Northshore	0	0	0
179	One North	0	0	0
180	One Tree Hill	0	0	0
181	Orange Grove	0	0	0
182	Oxley	0	0	0
183	Pandan	0	0	0
184	Pang Sua	1	0	0
185	Pasir Panjang 1	0	0	0
186	Pasir Panjang 2	0	0	0
187	Pasir Ris Central	0	4	0
188	Pasir Ris Drive	0	2	0
189	Pasir Ris Park	3	0	0
190	Pasir Ris Wafer Fab Park	0	0	0
191	Pasir Ris West	38	0	0
192	Paterson	0	0	0
193	Paya Lebar East	0	0	0
194	Paya Lebar North	0	0	0
195	Paya Lebar West	0	1	2
196	Pearl'S Hill	3	19	0
197	Pei Chun	1	1	0
198	Peng Siang	39	8	0
199	Penjuru Crescent	0	0	0
200	People'S Park	0	0	0
201	Phillip	0	0	0
202	Pioneer Sector	0	0	0
203	Plab	0	0	0
204	Port	0	0	2
205	Potong Pasir	0	0	0
206	Pulau Punggol Barat	0	0	0
207	Pulau Punggol Timor	0	0	0
208	Pulau Seletar	0	0	0
209	Punggol Canal	0	0	0
210	Punggol Field	3	12	0
211	Punggol Town Centre	3	0	0
212	Queensway	0	0	0
213	Raffles Place	0	0	0
214	Redhill	0	4	2
215	Reservoir View	0	0	0
216	Ridout	0	0	0
217	Rivervale	34	67	5
218	Robertson Quay	2	0	2
219	Rochor Canal	0	0	0
220	Safti	0	0	0
221	Samulun	0	0	0
222	Saujana	2	1	2
223	Selegie	0	0	0
224	Seletar	0	0	0
225	Seletar Aerospace Park	0	0	0
226	Seletar Hills	272	119	56
227	Semakau	0	0	0
228	Sembawang Central	6	2	1
229	Sembawang East	0	0	0
230	Sembawang Hills	9	25	3
231	Sembawang North	2	0	0
232	Sembawang Springs	0	0	0
233	Sembawang Straits	0	0	0
234	Sengkang Town Centre	48	40	24
235	Sengkang West	0	0	0
236	Senja	0	3	2
237	Sennett	0	0	0
238	Senoko North	0	0	0
239	Senoko South	0	0	1
240	Senoko West	0	0	0
241	Sentosa	0	0	0
242	Serangoon Central	27	12	11
243	Serangoon Garden	102	153	87
244	Serangoon North	6	4	0
245	Serangoon North Ind Estate	0	0	0
246	Shangri-La	2	9	1
247	Shipyard	0	0	0
248	Siglap	3	2	0
249	Simei	16	5	0
250	Simpang North	0	0	0
251	Simpang South	0	0	0
252	Singapore General Hospital	0	0	0
253	Singapore Polytechnic	0	0	0
254	Somerset	0	0	1
255	Southern Group	0	0	0
256	Springleaf	0	0	0
257	Straits View	0	0	0
258	Sudong	0	0	0
259	Sungei Road	0	0	0
260	Sunset Way	1	0	0
261	Swiss Club	0	0	0
262	Tagore	16	12	7
263	Tai Seng	24	5	8
264	Taman Jurong	6	0	0
265	Tampines East	2	1	1
266	Tampines North	0	0	0
267	Tampines West	3	6	0
268	Tanglin	0	0	0
269	Tanglin Halt	0	7	0
270	Tanjong Irau	0	0	0
271	Tanjong Pagar	0	0	0
272	Tanjong Rhu	0	0	0
273	Teban Gardens	0	0	0
274	Teck Whye	18	13	8
275	Telok Blangah Drive	9	0	0
276	Telok Blangah Rise	0	0	2
277	Telok Blangah Way	0	2	0
278	Tengah	0	0	0
279	Tengeh	0	0	0
280	The Wharves	0	0	0
281	Tiong Bahru	0	0	0
282	Tiong Bahru Station	6	0	0
283	Toa Payoh Central	2	4	0
284	Toa Payoh West	0	0	3
285	Toh Guan	2	2	2
286	Toh Tuck	0	0	0
287	Townsville	0	35	16
288	Trafalgar	42	7	13
289	Tuas Bay	0	0	0
290	Tuas North	0	0	0
291	Tuas Promenade	0	0	0
292	Tuas View	3	0	0
293	Tuas View Extension	0	0	0
294	Tukang	0	0	0
295	Turf Club	0	0	0
296	Tyersall	0	0	0
297	Ulu Pandan	2	10	1
298	Upper Paya Lebar	4	0	3
299	Upper Thomson	2	2	3
300	Victoria	0	0	0
301	Waterway East	0	2	0
302	Wenya	0	0	2
303	West Coast	1	14	4
304	Western Water Catchment	0	1	1
305	Woodgrove	2	4	0
306	Woodlands East	14	4	9
307	Woodlands Regional Centre	0	0	0
308	Woodlands South	10	8	5
309	Woodlands West	2	4	0
310	Woodleigh	0	0	0
311	Xilin	0	0	0
312	Yew Tee	8	5	2
313	Yio Chu Kang	0	0	0
314	Yio Chu Kang East	17	2	2
315	Yio Chu Kang North	0	0	0
316	Yio Chu Kang West	19	3	2
317	Yishun Central	0	0	0
318	Yishun East	10	5	0
319	Yishun South	5	17	0
320	Yishun West	20	15	0
321	Yuhua East	40	3	6
322	Yuhua West	13	6	1
323	Yunnan	87	130	86
		2034	1834	941	4809	Total
					1603	monthly avg.
